1 **OGT binds a conserved C-terminal domain of TET1 to regulate TET1 activity and function in**  
2 **development**

3  
4 Joel Hrit<sup>1,2</sup>, Cheng Li<sup>3,4</sup>, Elizabeth Allene Martin<sup>1,2</sup>, Eric Simental<sup>1,2</sup>, Mary Goll<sup>3,5</sup>, and Barbara  
5 Panning<sup>1\*</sup>

6  
7 <sup>1</sup>Department of Biochemistry and Biophysics, University of California San Francisco, San  
8 Francisco, CA, United States

9 <sup>2</sup>TETRAD Graduate Program, University of California San Francisco, San Francisco, CA, United  
10 States

11 <sup>3</sup>Developmental Biology Program, Memorial Sloan Kettering Cancer Center, New York, NY,  
12 United States

13 <sup>4</sup>Program in Biochemistry and Structural Biology, Cell and Developmental Biology, and  
14 Molecular Biology, Weill Cornell Graduate School of Medical Sciences, Cornell University, New  
15 York, NY, United States

16 <sup>5</sup>Current Affiliation: Department of Genetics, University of Georgia, Athens, GA, United States

17 \*Correspondence: [barbara.panning@ucsf.edu](mailto:barbara.panning@ucsf.edu)  
18  
19  
20  
21  
22  
23  
24  
25  
26  
27  
28  
29  
30  
31  
32  
33  
34  
35  
36  
37  
38  
39  
40  
41  
42  
43  
44

## 45 **Abstract**

46 TET enzymes convert 5-methylcytosine to 5-hydroxymethylcytosine and higher oxidized  
47 derivatives. TETs stably associate with and are post-translationally modified by the nutrient-  
48 sensing enzyme OGT, suggesting a connection between metabolism and the epigenome. Here,  
49 we show for the first time that modification by OGT enhances TET1 activity *in vitro*. We identify  
50 a domain of TET1 responsible for binding to OGT and report a point mutation that disrupts the  
51 TET1-OGT interaction. We show that the TET1-OGT interaction is necessary for TET1 to rescue  
52 hematopoietic stem cell production in tet mutant zebrafish embryos, suggesting that OGT  
53 promotes TET1's function during development. Finally, we show that disrupting the TET1-OGT  
54 interaction in mouse embryonic stem cells changes the abundance of TET-containing high  
55 molecular weight complexes and causes widespread gene expression changes. These results  
56 link metabolism and epigenetic control, which may be relevant to the developmental and  
57 disease processes regulated by these two enzymes.

## 60 **Introduction**

61 Methylation at the 5' position of cytosine in DNA is a widespread epigenetic regulator of  
62 gene expression. Proper deposition and removal of this mark is indispensable for normal  
63 vertebrate development, and misregulation of DNA methylation is a common feature in many  
64 diseases [1,2]. The discovery of the Ten-Eleven Translocation (TET) family of enzymes, which  
65 iteratively oxidize 5-methylcytosine (5mC) to 5-hydroxymethylcytosine (5hmC), 5-  
66 formylcytosine (5fC), and 5-carboxylcytosine (5caC), has expanded the epigenome [3-7]. These  
67 modified cytosines have multiple roles, functioning both as transient intermediates in an active  
68 DNA demethylation pathway [6,8-11] and as stable epigenetic marks [12,13] that may recruit  
69 specific readers [14].

70 One interesting interaction partner of TET proteins is *O*-linked N-acetylglucosamine (*O*-  
71 GlcNAc) Transferase (OGT). OGT is the sole enzyme responsible for attaching a GlcNAc sugar to  
72 serine, threonine, and cysteine residues of over 1,000 nuclear, cytoplasmic, and mitochondrial  
73 proteins [15-17]. Like phosphorylation, *O*-GlcNAcylation is a reversible modification that affects  
74 the function of target proteins. OGT's targets regulate gene expression [18,19], metabolism  
75 [16,20,21], and signaling [22,23], consistent with OGT's role in development and disease  
76 [24,25].

77 OGT stably interacts with and modifies all three TET proteins and its genome-wide  
78 distribution overlaps significantly with TETs [26-28]. Two studies in mouse embryonic stem cells  
79 (mESCs) have suggested that TET1 and OGT may be intimately linked in regulation of gene  
80 expression, as depleting either enzyme reduced the chromatin association of the other and  
81 affected expression of its target genes [26,29]. However, it is unclear to what extent these  
82 genome-wide changes are direct effects of perturbing the TET1-OGT interaction. Further work  
83 is necessary to uncover the biological importance of the partnership between TET1 and OGT.

84 In this work, we map the interaction between TET1 and OGT to a small C-terminal region  
85 of TET1, which is both necessary and sufficient to bind OGT. We show for the first time that  
86 OGT modifies the catalytic domain of TET1 *in vitro* and enhances its catalytic activity. We also  
87 use mutant TET1 to show that the TET1-OGT interaction promotes TET1 function in the  
88 developing zebrafish embryo. Finally, we show that in mESCs a mutation in TET1 that impairs its

89 interaction with OGT results in alterations in gene expression, in 5mC distribution, and in the  
90 abundance of TET1-, TET2-, and TET3-containing high molecular weight complexes. Together  
91 these results suggest that OGT regulates TET1 activity, indicating that the TET1-OGT interaction  
92 may be two-fold in function – allowing TET1 to recruit OGT to specific genomic loci and allowing  
93 OGT to modulate TET1 activity.

94  
95

## 96 **Materials and Methods**

97

### 98 **Cell Culture**

99 The mESC line LF2, and its derivatives were routinely passaged by standard methods in  
100 KO-DMEM, 10% FBS, 2 mM glutamine, 1X non-essential amino acids, 0.1 mM b-  
101 mercaptoethanol and recombinant leukemia inhibitory factor. HEK293T were cultured in  
102 DMEM, 10% FBS, and 2 mM glutamine.

103

### 104 **Recombinant protein purification**

105 Full-length human OGT in the pBJG vector was transformed into BL-21 DE3 E. coli. A  
106 liquid culture was grown in LB + 50ug/mL kanamycin at 37C until OD<sub>600</sub> reached 1.0. IPTG was  
107 added to 1mM final and the culture was induced at 16C overnight. Cells were pelleted by  
108 centrifugation and resuspended in 5mL BugBuster (Novagen) + protease inhibitors (Sigma  
109 Aldrich) per gram of cell pellet. Cells were lysed on an orbital shaker for 20 minutes at room  
110 temperature. The lysate was clarified by centrifugation at 30,000g for 30 minutes at 4C.  
111 Clarified lysate was bound to Ni-NTA resin (Qiagen) at 4C and then poured over a disposable  
112 column. The column was washed with 6 column volumes of wash buffer 1 (20mM Tris pH 8,  
113 1mM CHAPS, 10% glycerol, 5mM BME, 10mM imidazole, 250mM NaCl) followed by 6 column  
114 volumes of wash buffer 2 (wash buffer 1 with 50mM imidazole). The protein was eluted in 4  
115 column volumes of elution buffer (20mM Tris pH 8, 1mM CHAPS, 5mM BME, 250mM imidazole,  
116 250mM NaCl). Positive fractions were pooled and dialyzed into storage buffer (20mM Tris pH 8,  
117 1mM CHAPS, 0.5mM THP, 10% glycerol, 150mM NaCl, 1mM EDTA), flash frozen in liquid  
118 nitrogen and stored at -80C in small aliquots.

119 Mouse TET1 catalytic domain (aa1367-2039) was expressed in sf9 insect cells according  
120 to the Bac-to-Bac Baculovirus Expression System. Constructs were cloned into the pFastBac HTA  
121 vector and transformed in DH10Bac E. coli for recombination into a bacmid. Bacmid containing  
122 the insert was isolated and used to transfect adherent sf9 cells for 6 days at 25C. Cell media (P1  
123 virus) was isolated and used to infect 20mL of sf9 cells in suspension for 3 days. Cell media (P2  
124 virus) was isolated and used to infect a larger sf9 suspension culture for 3 days. Cells were  
125 pelleted by centrifugation, resuspended in lysis buffer (20mM Tris pH 8, 1% Triton, 10%  
126 glycerol, 20mM imidazole, 50mM NaCl, 1mM MgCl<sub>2</sub>, 0.5mM TCEP, protease inhibitors, 2.5U/mL  
127 benzonase), and lysed by douncing and agitation at 4C for 1 hour. The lysate was clarified by  
128 centrifugation at 48,000g for 30 minutes at 4C and bound to Ni-NTA resin (Qiagen) at 4C, then  
129 poured over a disposable column. The column was washed with 5 column volumes of wash  
130 buffer (20mM Tris pH 8, 0.3% Triton, 10% glycerol, 20mM imidazole, 250mM NaCl, 0.5mM  
131 TCEP, protease inhibitors). The protein was eluted in 5 column volumes of elution buffer  
132 (20mM Tris pH 8, 250mM imidazole, 250mM NaCl, 0.5mM TCEP, protease inhibitors). Positive

133 fractions were pooled and dialyzed overnight into storage buffer (20mM Tris pH 8, 150mM  
134 NaCl, 0.5mM TCEP). Dialyzed protein was purified by size exclusion chromatography on a  
135 120mL Superdex 200 column (GE Healthcare). Positive fractions were pooled, concentrated,  
136 flash frozen in liquid nitrogen and stored at -80C in small aliquots.

137

### 138 **Overexpression in HEK293T cells and immunoprecipitation**

139 Mouse Tet1 catalytic domain (aa1367-2039) and truncations and mutations thereof  
140 were cloned into the pcDNA3b vector. GFP fusion constructs were cloned into the pcDNA3.1  
141 vector. Human OGT constructs were cloned into the pcDNA4 vector. Plasmids were transiently  
142 transfected into adherent HEK293T cells at 70-90% confluency using the Lipofectamine 2000  
143 transfection reagent (ThermoFisher) for 1-3 days.

144 Full-length mouse Tet1 and mutations thereof were cloned into the pCAG vector.  
145 Plasmids were transiently transfected into adherent HEK293T cells at 70-90% confluency using  
146 the PolyJet transfection reagent (SignaGen) for 1-3 days.

147 Transiently transfected HEK293T cells were harvested, pelleted, and lysed in IP lysis  
148 buffer (50mM Tris pH 8, 200mM NaCl, 1% NP40, 1x HALT protease/phosphatase inhibitors). For  
149 pulldown of FLAG-tagged constructs, cell lysate was bound to anti-FLAG M2 magnetic beads  
150 (Sigma Aldrich) at 4C. For pulldown of GFP constructs, cell lysate was bound to magnetic  
151 protein G dynabeads (ThermoFisher) conjugated to the JL8 GFP monoclonal antibody (Clontech)  
152 at 4C. Beads were washed 3 times with IP wash buffer (50mM Tris pH 8, 200mM NaCl, 0.2%  
153 NP40, 1x HALT protease/phosphatase inhibitors). Bound proteins were eluted by boiling in SDS  
154 sample buffer.

155

### 156 ***In vitro* transcription/translation and immunoprecipitation**

157 GFP fused to TET C-terminus peptides were cloned into the pcDNA3.1 vector and  
158 transcribed and translated *in vitro* using the TNT Quick Coupled Transcription/Translation  
159 System (Promega).

160 For immunoprecipitation, recombinant His-tagged OGT was coupled to His-Tag isolation  
161 dynabeads (ThermoFisher). Beads were bound to *in vitro* translation extract diluted 1:1 in  
162 binding buffer (40mM Tris pH 8, 200mM NaCl, 40mM imidazole, 0.1% NP40) at 4C. Beads were  
163 washed 3 times with wash buffer (20mM Tris pH 8, 150mM NaCl, 20mM imidazole, 0.1% NP40).  
164 Bound proteins were eluted by boiling in SDS sample buffer.

165

### 166 **Recombinant protein binding assay**

167 20uL reactions containing 2.5uM rOGT and 2.5uM rTET1 CD wt or D2018A were  
168 assembled in binding buffer (50mM Tris pH 7.5, 100mM NaCl, 0.02% Tween-20) and pre-  
169 incubated at room temperature for 15 minutes. TET1 antibody (Millipore 09-872) was bound to  
170 magnetic Protein G Dynabeads (Invitrogen), and beads added to reactions following pre-  
171 incubation. Reactions were bound to beads for 10 minutes at room temperature. Beads were  
172 washed 3 times with 100uL binding buffer, and bound proteins were recovered by boiling in  
173 SDS sample buffer and analyzed by SDS-PAGE and coomassie stain.

174

### 175 **Western blots**

176 For western blot, proteins were separated on a denaturing SDS-PAGE gel and  
177 transferred to PVDF membrane. Membranes were blocked in PBST + 5% nonfat dry milk at  
178 room temp for >10 minutes or at 4C overnight. Primary antibodies used for western blot were:  
179 FLAG M2 monoclonal antibody (Sigma Aldrich F1804), OGT polyclonal antibody (Santa Cruz  
180 sc32921), OGT monoclonal antibody (Cell Signaling D1D8Q), His6 monoclonal antibody (Thermo  
181 MA1-21315), JL8 GFP monoclonal antibody (Clontech), and O-GlcNAc RL2 monoclonal antibody  
182 (Abcam). Secondary antibodies used were goat anti-mouse HRP and goat anti-rabbit HRP from  
183 BioRad. Blots were incubated with Pico Chemiluminescent Substrate (ThermoFisher) and  
184 exposed to film in a dark room.

185

#### 186 **Slot blot**

187 Prior to dilution of genomic DNA samples, biotinylated *E. coli* gDNA was added as a  
188 loading control (see below). DNA samples were denatured in 400mM NaOH + 10mM EDTA by  
189 heating to 95C for 10 minutes. Samples were placed on ice and neutralized by addition of 1  
190 volume of cold NH<sub>4</sub>OAc pH 7.2. DNA was loaded onto a Hybond N+ nylon membrane (GE) by  
191 vacuum using a slot blot apparatus. The membrane was dried at 37C and DNA was covalently  
192 linked to the membrane by UV crosslinking (700uJ/cm<sup>2</sup> for 3 minutes). Antibody binding and  
193 signal detection were performed as outlined for western blotting. Primary antibodies used were  
194 5mC monoclonal antibody (Active Motif 39649) and 5hmC monoclonal antibody (Active Motif  
195 39791).

196 For the loading control, membranes were analyzed using the Biotin Chromogenic  
197 Detection Kit (Thermo Scientific) according to the protocol. Briefly, membranes were blocked,  
198 probed with streptavidin conjugated to alkaline phosphatase (AP), and incubated in the AP  
199 substrate BCIP-T (5-bromo-4-chloro-3-indolyl phosphate, p-toluidine salt). Cleavage of BCIP-T  
200 causes formation of a blue precipitate.

201 For quantification of slot blots, at least 3 biological replicates were used. Signal was  
202 normalized to the loading control and significance was determined using the unpaired t test.

203

#### 204 **Preparation of lambda DNA substrate**

205 Linear genomic DNA from phage lambda (dam-, dcm-) containing 12bp 5' overhangs was  
206 purchased from Thermo Scientific. Biotinylation was performed by annealing and ligating a  
207 complementary biotinylated DNA oligo. Reactions containing 175ng/uL lambda DNA, 2uM  
208 biotinylated oligo, and 10mM ATP were assembled in 1x T4 DNA ligase buffer, heated to 65C,  
209 and cooled slowly to room temperature to anneal. 10uL T4 DNA ligase was added and ligation  
210 was performed overnight at room temperature. Biotinylated lambda DNA was purified by PEG  
211 precipitation. To a 500uL ligation reaction, 250uL of PEG8000 + 10mM MgCl<sub>2</sub> was added and  
212 reaction was incubated at 4C overnight with rotation. The next day DNA was pelleted by  
213 centrifugation at 14,000g at 4C for 5 minutes. Pellet was washed with 1mL of 75% ethanol and  
214 resuspended in TE.

215 Biotinylated lambda DNA was methylated using M.SssI CpG methyltransferase from  
216 NEB. 20uL reactions containing 500ng lambda DNA, 640uM S-adenosylmethionine, and 4 units  
217 methyltransferase were assembled in 1x NEBuffer 2 supplemented with 20mM Tris pH 8 and  
218 incubated at 37C for 1 hour. Complete methylation was confirmed by digestion with the  
219 methylation-sensitive restriction enzyme BstUI from NEB.

220

### 221 ***In vitro* TET1 CD O-GlcNAcylation**

222 *In vitro* modification of rTET1 CD with rOGT was performed as follows: 10uL reactions  
223 containing 1uM rTET1 CD, 1-5uM rOGT, and 1mM UDP-GlcNAc were assembled in reaction  
224 buffer (50mM HEPES pH 6.8, 150mM NaCl, 10% glycerol, 0.5mM TCEP) and incubated at 37C for  
225 30-60 minutes or at 4C for 18-24 hours.

226

### 227 ***In vitro* TET1 CD activity assays**

228 20uL reactions containing 100ng biotinylated, methylated lambda DNA, rTET1 CD (from  
229 frozen aliquots or from *in vitro* O-GlcNAcylation reactions), and TET cofactors (1mM alpha-  
230 ketoglutarate, 2mM ascorbic acid, 100uM ferrous ammonium sulfate) were assembled in  
231 reaction buffer (50mM HEPES pH 6.8, 100mM NaCl) and incubated at 37C for 10-60 minutes.  
232 Reactions were stopped by addition of 1 volume of 2M NaOH + 50mM EDTA and DNA was  
233 analyzed by slot blot.

234

### 235 **Generation of mouse embryonic stem cell lines**

236 mESC lines (Fig. 3 – figure supplement 1A, B) were derived using CRISPR-Cas9 genome  
237 editing. A guide RNA to the Tet1 3'UTR was cloned into the px459-Cas9-2A-Puro plasmid using  
238 published protocols [30] with minor modifications. Templates for homology directed repair  
239 were amplified from Gene Blocks (IDT) (Supplementary File 1A, B). Plasmid and template were  
240 co-transfected into LF2 mESCs using FuGENE HD (Promega) according to manufacturer  
241 protocol. After two days cells were selected with puromycin for 48 hours, then allowed to grow  
242 in antibiotic-free media. Cells were monitored for green or red fluorescence (indicating  
243 homology directed repair) and fluorescent cells were isolated by FACS 1-2 weeks after  
244 transfection. All cell lines were propagated from single cells and correct insertion was  
245 confirmed by PCR genotyping (Fig. 3 – figure supplement 1A, B, Supplementary File 1A).

246

### 247 **Chromosome Spread Preparations**

248 Chromosome spreads were prepared using hypotonic swelling and methanol:acetic acid  
249 fixation following established protocols[31]

250

### 251 **Immunofluorescence and Imaging**

252 Slides were incubated in 1M HCl at 37C for 45 minutes to denature chromatin, then  
253 neutralized in 100mM Tris pH 7.6 at room temperature for 10 minutes. Slides were washed  
254 twice in PBST for 5 minutes, then blocked in IF blocking buffer (PBS + 5% goat serum, 0.2% fish  
255 skin gelatin, 0.2% Tween-20) at room temperature for 1 hour. Primary antibodies were diluted  
256 in blocking buffer and incubated on slides at 4C overnight. Primary antibodies used were FLAG  
257 M2 monoclonal antibody (Sigma Aldrich F1804), 5mC monoclonal antibody (Active Motif  
258 39649), and 5hmC polyclonal antibody (Active Motif 39791). Slides were washed twice in PBST  
259 for 5 minutes, then incubated with secondary antibodies diluted in IF blocking buffer.  
260 Secondary antibodies used were Alexa488-conjugated goat anti-rabbit IgG (Jackson 711-545-  
261 152), Cy3-conjugated goat anti-rabbit IgG (Jackson 715-165-152), and Cy3-conjugated goat anti-  
262 mouse IgG (Jackson 715-165-150). Slides were washed three times in PBST for 5 minutes with  
263 DAPI added to the second wash (final concentration 100ng/mL). Slides were then mounted



264 using prolong gold antifade (Molecular Probes P36930) and imaged. For comparisons between  
265 cell lines, all images were taken with the same exposure time, and any image processing was  
266 performed identically on all images. 10um scale bars are included.

267

### 268 **mESC nuclei isolation and fractionation**

269 For isolation of nuclei, mESCs were lysed in buffer 1 (10mM Tris pH 8, 320mM sucrose,  
270 3mM CaCl<sub>2</sub>, 2mM MgOAc, 0.1mM EDTA, 0.1% Triton X-100, 1mM DTT, and protease inhibitors).  
271 Lysed cells were diluted in two volumes of buffer 2 (10mM Tris pH 8, 2M sucrose, 5mM MgOAc,  
272 0.1mM EDTA, 5mM DTT, and protease inhibitors), then layered over buffer 2 in a centrifuge  
273 tube. Nuclei were pelleted by centrifugation at 37,000rpm at 4C for 45 minutes and recovered.

274 Nuclei were lysed in nuclear lysis buffer (20mM Tris pH 8, 300mM NaCl, 10% glycerol,  
275 0.25% Igepal, and protease inhibitors). Nuclear proteins were fractionated on a Superose 6  
276 Increase 10/300 GL column at 0.5mL/min in nuclear lysis buffer. 0.5mL fractions were collected,  
277 concentrated, and analyzed by western blot.

278

### 279 **RNA-seq**

280 Libraries for RNA-seq were prepared using the TruSeq PolyA kit. Two replicates of Tet1  
281 wild-type and three replicates of Tet1 D2018A lines were passed quality control and were  
282 analyzed. Single-end 50bp RNAseq was performed on an Illumina HiSeq 4000 sequencer. Reads  
283 were mapped to the mouse genome (GRCm38.78), and reads uniquely mapped to known  
284 mRNAs were used to assess expression changes between genes. Only genes with FDR < 0.1  
285 were considered in downstream analyses.

286

### 287 **RT-qPCR**

288 Total RNA was isolated from mESCs using Direct-zol RNA miniprep kit from Zymo. 1ug of  
289 RNA was used for cDNA synthesis using the iScript Reverse Transcription kit from BioRad. cDNA  
290 was used for qPCR using the SensiFAST SYBR Lo-Rox kit from Bioline. Relative gene expression  
291 levels were calculated using the  $\Delta\Delta C_t$  method. See Supplementary File 2A for primer sequences.

292

### 293 **Bisulfite conversion and analysis**

294 Reactions containing 200ng of mESC genomic DNA + 200ng phage lambda genomic DNA  
295 were bisulfite treated and purified using the EZ DNA Methylation Lightning kit from Zymo.  
296 DMRs for the genes *H19*, *Peg10*, and *Mest* were amplified using bisulfite specific primers (see  
297 Supplementary File 2B for primer sequences and genomic coordinates). Amplified DMRs were  
298 cloned into the pCR-Blunt II-TOPO plasmid and sequenced. A region of phage lambda DNA was  
299 sequenced to confirm complete bisulfite conversion.

300

### 301 **Zebrafish mRNA rescue experiments**

302 Zebrafish husbandry was conducted under full animal use and care guidelines with  
303 approval by the Memorial Sloan-Kettering animal care and use committee. For mRNA rescue  
304 experiments, mTET1D2018A and mTET1wt plasmids were linearized by NotI digestion. Capped  
305 RNA was synthesized using mMessage mMachine (Ambion) with T7 RNA polymerase. RNA was  
306 injected into one-cell-stage embryos derived from tet2<sup>mk17/mk17</sup>, tet3<sup>mk18/+</sup> intercrosses at the  
307 concentration of 100pg/embryo [32]. Injected embryos were raised under standard conditions

308 at 28.5°C until 30 hours post-fertilization (hpf) at which point they were fixed for *in situ*  
309 hybridization using an antisense probe for *runx1*. The *runx1* probe is described in [33]; *in situ*  
310 hybridization was performed using standard methods, and *runx1* levels were scored across  
311 samples without knowledge of the associated experimental conditions [34]. Examples of larvae  
312 categorized as *runx1* high and *runx1* low are provided in Supplementary File 3. *tet2/3* double  
313 mutants were identified based on morphological criteria and mutants were confirmed by PCR  
314 genotyping after *in situ* hybridization using previously described primers [32].

315 For sample size estimation for rescue experiments, we assume a background mean of  
316 20% positive animals in control groups. We anticipate a significant change would result in at  
317 least a 30% difference between the experimental and control means with a standard deviation  
318 of no more than 10. Using the 1-Sample Z-test method, for a specified power of 95% the  
319 minimum sample size is 4. Typically, zebrafish crosses generate far more embryos than  
320 required. Experiments are conducted using all available embryos. The experiment is discarded if  
321 numbers for any sample are below this minimum threshold when embryos are genotyped at  
322 the end of the experimental period. Injections were separately performed on clutches from five  
323 independent crosses; p values are based on these replicates and were derived from the  
324 unpaired two-tailed *t* test. Embryo numbers for all five biological replicates are included in  
325 Supplementary File 3.

326 For the dot blot, genomic DNA was isolated from larvae at 30hpf by phenol-chloroform  
327 extraction and ethanol precipitation. Following RNase treatment and denaturation, 2-fold  
328 serially diluted DNA was spotted onto nitrocellulose membranes. Cross-linked membranes were  
329 incubated with 0.02% methylene blue to validate uniform DNA loading. Membranes were  
330 blocked with 5% BSA and incubated with anti-5hmC antibody (1:10,000; Active Motif) followed  
331 by a horseradish peroxidase-conjugated antibody (1:15,000; Active Motif). Signal was detected  
332 using the ECL Prime Detection Kit (GE). The results of three independent experiments were  
333 quantified using ImageJ at the lowest dilution and exposure where signal was observed in Tet1  
334 injected embryos. To normalize across blots, all values are presented as the ratio of 5hmC  
335 signal in experimental animals divided by wildtype control signal from the same blot.

336

### 337 **Reproducibility and Rigor**

338 All immunostaining, IP-Westerns, and genomic DNA slot blot data are representative of  
339 at least three independent biological replicates (experiments carried out on different days with  
340 a different batch of HEK293T cells or mESCs). For targeted mESC lines, three independently  
341 derived lines for each genotype were assayed in at least two biological replicates. For *in vitro*  
342 activity and binding assays using recombinant proteins (representing multiple protein  
343 preparations), data represent at least three technical replicates (carried out on multiple days).  
344 The zebrafish rescue experiment was performed five times (biological replicates), with dot blots  
345 carried out three times. We define an outlier as a result in which all the controls gave the  
346 expected outcome but the experimental sample yielded an outcome different from other  
347 biological or technical replicates. There were no outliers or exclusions.

348

349

## 350 **Results**

351



## 352 **A short C-terminal region of TET1 is necessary for binding to OGT**

353 TET1 and OGT interact with each other and are mutually dependent for their localization  
354 to chromatin[26]. To understand the role of this association, it is necessary to specifically  
355 disrupt the TET1-OGT interaction. All three TETs interact with OGT via their catalytic domains  
356 [27,28,35]. We sought to identify the region within the TET1 catalytic domain (TET1 CD)  
357 responsible for binding to OGT. The TET1 CD consists of a cysteine-rich N-terminal region  
358 necessary for co-factor and substrate binding, a catalytic fold consisting of two lobes separated  
359 by a spacer of unknown function, and a short C-terminal region also of unknown function (Fig.  
360 1A). We transiently transfected HEK293T cells with FLAG-tagged mouse TET1 CD constructs  
361 bearing deletions of each of these regions, some of which failed to express (Fig. 1B). Because  
362 HEK293T cells have low levels of endogenous OGT, we also co-expressed His-tagged human  
363 OGT (identical to mouse at 1042 of 1046 residues). TET1 constructs were immunoprecipitated  
364 (IPed) using a FLAG antibody and analyzed for interaction with OGT. We found that deletion of  
365 only the 45 residue C-terminus of TET1 (hereafter C45) prevented detectable interaction with  
366 OGT (Fig. 1B, TET1 CD del. 4). To exclude the possibility that this result is an artifact of OGT  
367 overexpression, we repeated the experiment overexpressing only TET1. TET1 CD, but not TET1  
368 CD  $\Delta$ C45, interacted with endogenous OGT, confirming that the C45 is necessary for this  
369 interaction (Fig. 1 – figure supplement 1).

370 OGT has two major domains: the N-terminus consists of 13.5 tetratricopeptide repeat  
371 (TPR) protein-protein interaction domains, and the C-terminus contains the bilobed catalytic  
372 domain (Fig. 1C). We made internal deletions of several sets of TPRs to ask which are  
373 responsible for binding to the TET1 CD. We co-transfected HEK293T cells with FLAG-TET1 CD  
374 and His6-tagged OGT constructs and performed FLAG IP and western blot as above. We found  
375 that all the TPR deletions tested impaired the interaction with TET1 CD, with deletion of TPRs 7-  
376 9, 10-12, or 13-13.5 being most severe (Fig. 1C). This result suggests that all of OGT's TPRs may  
377 be involved in binding to the TET1 CD, or that deletion of a set of TPRs disrupts the overall  
378 structure of the repeats in a way that disfavors binding.

379

## 380 **Conserved residues in the TET1 C45 are necessary for the TET1-OGT interaction**

381 An alignment of the TET1 C45 region with the C-termini of TET2 and TET3 revealed  
382 several conserved residues (Fig. 2A). We mutated clusters of three conserved residues in the  
383 TET1 C45 of FLAG-tagged TET1 CD (Fig. 2B) and co-expressed these constructs with His-OGT in  
384 HEK293T cells. FLAG pulldowns revealed that two sets of point mutations disrupted the  
385 interaction with OGT: mutation of D2018, V2021, and T2022, or mutation of V2021, T2022, and  
386 S2024 (Fig. 2C, mt1 and mt2). These results suggested that the residues between D2018 and  
387 S2024 are crucial for the interaction between TET1 and OGT. Further mutational analysis  
388 revealed that altering D2018 to A (D2018A) eliminated detectable interaction between FLAG-  
389 tagged TET1 CD and His-OGT (Fig. 2D).

390

## 391 **The TET1 C-terminus is sufficient for binding to OGT**

392 Having shown that the TET1 C45 is necessary for the interaction with OGT, we next  
393 examined if it is also sufficient to bind OGT. We fused the TET1 C45 to the C-terminus of GFP  
394 (Fig. 3A) and investigated its interaction with OGT. We transiently transfected GFP or GFP-C45

395 into HEK293T cells and pulled down with a GFP antibody. We found that GFP-C45, but not GFP  
396 alone, bound OGT (Fig. 3B), indicating that the TET1 C45 is sufficient for interaction with OGT.

397 To determine if the interaction between TET1 CD and OGT is direct, we employed  
398 recombinant proteins in pulldown assays using beads conjugated to a TET1 antibody. We used  
399 recombinant human OGT (rOGT) isolated from *E. coli* and recombinant mouse TET1 catalytic  
400 domain (aa1367-2039), either wild type (rTET1 wt) or D2018A (rD2018A) purified from sf9 cells.  
401 rTET1 wt, but not beads alone, pulled down rOGT, indicating a direct interaction between these  
402 proteins (Fig. 3C). rD2018A did not pull down rOGT, consistent with our mutational analysis in  
403 cells. Then we used an *in vitro* transcription/translation extract to produce GFP and GFP-C45,  
404 incubated each with rOGT, and found that the TET1 C45 is sufficient to confer binding to rOGT  
405 (Fig. 3D). The D2018A mutation in the GFP-C45 was also sufficient to prevent rOGT binding (Fig.  
406 3D), consistent with the behavior of TET1 CD D2018A in cells. Together these results indicate  
407 that the TET1-OGT interaction is direct and mediated by the TET1 C45.

408

#### 409 **The D2018A mutation impairs TET1 CD stimulation by OGT**

410 We employed the D2018A mutation to investigate the effects of perturbing the TET1-OGT  
411 interaction on rTET1 activity. rTET1 wt and rD2018A catalyzed formation of 5hmC on an *in vitro*  
412 methylated lambda DNA substrate (Fig. 4A). Incubation with rOGT and OGT's cofactor UDP-  
413 GlcNAc resulted in *O*-GlcNAcylation of rTET1 wt but not rD2018A (Fig. 4B).

414 To explore whether *O*-GlcNAcylation affects TET1 CD activity, we incubated rTET1 wt  
415 and rD2018A with UDP-GlcNAc and rOGT individually or together and assessed 5hmC  
416 production. Addition of UDP-GlcNAc did not significantly affect activity of rTET1 wt or rD2018A.  
417 Incubation with rOGT alone slightly enhanced 5hmC synthesis by rTET1 wt (1.3-1.7-fold), but  
418 not rD2018A. We observed robust stimulation of TET activity (4-5-fold) when rTET1 wt but not  
419 rD2018A was incubated with rOGT and UDP-GlcNAc (Fig. 4C-F). These results suggest that while  
420 the TET1-OGT protein-protein interaction may slightly enhance TET1's activity, the *O*-GlcNAc  
421 modification is responsible for the majority of the observed stimulation.

422

#### 423 **The TET-OGT interaction promotes TET1 function in the zebrafish embryo**

424 We used zebrafish as a model system to ask whether the D2018A mutation affects TET  
425 function during development. Deletion analysis of *tets* in zebrafish showed that Tet2 and Tet3  
426 are the most important in development, while Tet1 contribution is relatively limited [32].  
427 Deletion of both *tet2* and *tet3* (*tet2/3<sup>DM</sup>*) causes a severe decrease in 5hmC levels accompanied  
428 by larval lethality owing to abnormalities including defects in hematopoietic stem cell (HSC)  
429 production. Reduced HSC production is visualized by reductions in the transcription factor  
430 *runx1*, which marks HSCs in the dorsal aorta of wild-type embryos, but is largely absent from  
431 this region in *tet2/3<sup>DM</sup>* embryos. 5hmC levels and *runx1* expression are rescued by injection of  
432 human TET2 or TET3 mRNA into one-cell-stage embryos [32].

433 Given strong sequence conservation among vertebrate TET/Tet proteins, we asked if  
434 over expression of mouse Tet1 mRNA could also rescue HSC production in *tet2/3<sup>DM</sup>* zebrafish  
435 embryos and if this rescue is OGT interaction-dependent. To this end, *tet2/3<sup>DM</sup>* embryos were  
436 injected with wild type or D2018A mutant encoding mouse Tet1 mRNA at the one cell stage. At  
437 30 hours post fertilization (hpf) embryos were fixed and the presence of *runx1* positive HSCs in  
438 the dorsal aorta was assessed by *in situ* hybridization (Fig. 5A). Tet1 wild type mRNA

439 significantly increased the percentage of embryos with strong *runx1* labeling in the dorsal aorta  
440 (high *runx1*), while Tet1 D2018A mRNA failed to rescue *runx1* positive cells (Fig. 5A-B). We also  
441 performed dot blots with genomic DNA from these embryos to measure levels of 5hmC (Fig.  
442 5C). On average, embryos injected with wild type Tet1 mRNA showed a modest but significant  
443 increase in 5hmC relative to uninjected *tet2/3<sup>DM</sup>* embryos, while injection of TET1 D2018A  
444 mRNA did not show a significant increase (Fig. 5D). These results suggest that the TET1-OGT  
445 interaction promotes both TET1's catalytic activity and its ability to rescue *runx1* expression in  
446 this system.

447

#### 448 **The D2018A mutation alters TET-containing complexes in mESCs**

449 Given the defect of TET1 D2018A in the zebrafish system, we decided to explore the  
450 effect of this mutation in mammalian cells. To this end, we generated a D2018A mutation in  
451 both copies of the *Tet1* gene (Fig. 6A) in mESCs (Fig. 6 – figure supplement 1). A FLAG tag was  
452 also introduced onto the C-terminus of wild type (WT) or D2018A mutant (D2018A) TET1. We  
453 first tested whether D2018 was necessary for the TET1-OGT interaction in the context of  
454 endogenous full length TET1 in these cells. FLAG pulldowns revealed that the D2018A mutation  
455 reduced, but did not eliminate, co-IP of OGT with TET1 (Fig. 6B; Fig. 6 – figure supplement 1).  
456 Levels of 5hmC were comparable between WT and D2018A mESCs (Fig. 6C), suggesting that  
457 overall TET activity is similar.

458 In mESCs, TETs are found in high molecular weight complexes that also contain OGT and  
459 the OGT-interacting protein HCF1 [26]. To examine whether the D2018A mutation affected  
460 these complexes, we performed size exclusion chromatography on nuclear extracts prepared  
461 from WT and D2018A mESCs (Fig. 6D). Consistent with previous reports, in WT mESCs TET1 and  
462 TET2 were found in overlapping high molecular weight (>669kDa) complexes that contain OGT  
463 and HCF1. While TET3 is the smallest of the three TETs it was found in the highest molecular  
464 weight fractions, which also contained both OGT and HCF1. In D2018A mESCs all three TET-  
465 containing complexes were altered. Although the total amount of FLAG-TET1 was comparable  
466 between WT and D2018A cells (Fig. 6B), in D2018A mESCs the amount of FLAG-TET1 in high  
467 molecular weight fractions was reduced (Fig. 6D). This reduction coincided with an increase in  
468 abundance of FLAG-TET1 in lower molecular weight fractions that contained much less OGT and  
469 HCF1. In contrast, TET2 increased in abundance and shifted to higher molecular weight  
470 fractions, while TET3 decreased in abundance but remained in the same fractions (Fig. 6D).  
471 These results suggest that the normal interaction between TET1 and OGT is necessary for the  
472 proper distribution of TET1, TET2, and TET3 in high molecular weight complexes. The increase  
473 in the amount of TET2 in D2018A mESCs may explain why bulk 5hmC levels were not  
474 appreciably affected by this mutation (Fig 6C).

475

#### 476 **The D2018A mutation alters 5mC distribution and gene expression**

477 To determine whether these alterations in TET-containing high molecular weight  
478 complexes affected gene expression, we compared WT and D2018A mESCs using RNA-seq. Of  
479 the roughly 8800 expressed genes (FDR <0.1), we found over 2000 genes whose expression  
480 changed by 2-fold or more in D2018A cells compared to WT (596 upregulated genes and 1639  
481 downregulated genes) (Fig. 7A, Supplementary File 4). These results show that a single amino  
482 acid substitution in TET1 causes a substantial change in global gene expression.

483 In mouse development TET1 is necessary for normal expression of many imprinted  
484 genes[36], prompting us to examine this class of genes. Of the 35 imprinted genes with  
485 detectable expression (FDR <0.1) in either WT or D2018A mESCs, 14 changed expression by 2-  
486 fold or more and an additional 8 changed expression by 1.5-2-fold (Supplementary File 5). RT-  
487 qPCR for selected imprinted genes in WT and D2018A mESCs confirmed the gene expression  
488 changes found by RNA-seq (Fig. 7B). These data suggest that imprinted genes may be subject to  
489 regulation by TET1 and OGT in mESCs.

490 Since TETs act to remove DNA methylation, we wondered whether the changes in  
491 imprinted gene expression in D2018A mESCs might be due to changes in the methylation status  
492 of differentially methylated regions (DMRs). We therefore performed targeted bisulfite analysis  
493 of DMRs associated with three imprinted genes, *H19*, *Peg10*, and *Mest*, which were  
494 upregulated in D2018A mESCs compared to WT. We found that the *H19* DMR was heavily  
495 methylated in WT cells (79% +/- 5.7%) but significantly less methylated in D2018A cells (21% +/-  
496 17%) (Fig. 7C), consistent with the very large (~30-fold) increase in expression of *H19* in D2018A  
497 cells compared to WT. In contrast, the *Peg10* and *Mest* DMRs were almost completely  
498 unmethylated in both cell types (Fig. 7C), indicating that large changes in DMR methylation do  
499 not account for the altered expression of these imprinted genes.

500 To examine whether regions other than DMRs exhibited altered cytosine modifications,  
501 we performed immunofluorescence staining for 5mC and 5hmC on chromosome spread  
502 preparations from WT and D2018A mESCs (Fig. 7D). Although 5hmC staining was comparable  
503 between the two cell lines, we observed a striking difference in the distribution of 5mC. While  
504 WT cells showed enrichment of 5mC staining at pericentric heterochromatin, no such  
505 enrichment was observed in D2018A cells. These analyses of cytosine modifications at  
506 imprinted gene DMRs and pericentric heterochromatin indicate that the D2018A mutation has  
507 a substantial impact on 5mC abundance and distribution, as well as gene expression.

508  
509

## 510 Discussion

511

### 512 A unique OGT interaction domain?

513 We identified a 45-amino acid domain of TET1 that is both necessary and sufficient for  
514 binding of OGT. To our knowledge, this is the first time that a small protein domain has been  
515 identified that confers stable binding to OGT. The vast majority of OGT targets do not bind to  
516 OGT tightly enough to be detected in co-IP experiments, suggesting that OGT's interaction with  
517 TET proteins is unusually strong. For determination of the crystal structure of the human TET2  
518 catalytic domain in complex with DNA, the corresponding C-terminal region was deleted [37],  
519 suggesting that it may be unstructured. When bound to OGT this domain may become  
520 structured, and structural studies of OGT bound to C45 could shed light on what features make  
521 this domain uniquely able to interact stably with OGT and how OGT may stimulate TET1  
522 activity.

523 An alternative or additional role for the stable TET-OGT interaction may be recruitment  
524 of OGT to chromatin by TET proteins. Loss of TET1 causes loss of OGT from chromatin [26] and  
525 induces similar changes in transcription in both wild-type mESCs and mESCs lacking DNA  
526 methylation [38]. This raises the possibility that TET proteins may recruit OGT to chromatin to

527 regulate gene expression independent of 5mC oxidation. Consistent with this possibility, OGT  
528 modifies many transcription factors and chromatin regulators in mESCs [39](Fig. 8). Thus it may  
529 be that the stable TET1-OGT interaction promotes both regulation of TET1 activity by O-  
530 GlcNAcylation as well as recruitment of OGT to chromatin. Notably, our results show that TET1  
531 D2018A does not rescue 5hmC levels in *tet2/3<sup>DM</sup>* zebrafish embryos to the same extent as the  
532 wild type protein, suggesting that at least part of the role of the TET1-OGT interaction *in vivo* is  
533 regulation of TET1 activity.

534

### 535 **OGT stimulation of TET activity**

536 Our results show for the first time that OGT can modify a TET protein *in vitro*, and that  
537 O-GlcNAcylation stimulates the activity of a TET protein *in vitro*. We have identified 8 sites of O-  
538 GlcNAcylation within the TET1 CD (data not shown), which precludes a simple analysis of which  
539 sites are important for stimulation. It is unclear how many sites are important for TET1  
540 function, as it is possible that the unusually stable interaction between OGT and TET1 allows  
541 OGT to nonspecifically modify serine/threonine residues on TET1. Detailed studies of individual  
542 sites of modification will be required to resolve this question.

543 Our data are also consistent with a role for OGT in TET1 regulation in cells and *in vivo*.  
544 OGT also directly interacts with TET2 and TET3, suggesting that it may regulate all three TET  
545 proteins. Notably, although all three TETs catalyze the same reaction, they show a number of  
546 differences that are likely to determine their biological role. Different TET proteins are  
547 expressed in different cell types and at different stages of development [40-43]. TET1 and TET2  
548 appear to target different genomic regions [44] and to promote different pluripotent states in  
549 mESCs [45]. The mechanisms responsible for these differences are not well understood. We  
550 suggest that OGT is a strong candidate for regulation of TET enzymes.

551

### 552 **Regulation of TETs by OGT in development**

553 Our result that wild type TET1 mRNA, but not TET1 mRNA carrying a mutation that can  
554 impair interaction with OGT, can rescue *tet2/3<sup>DM</sup>* zebrafish suggests that OGT regulation of TET  
555 enzymes may play a role in development. The importance of both TET proteins and OGT in  
556 development has been thoroughly established. Zebrafish lacking *tet2* and *tet3* die as larvae  
557 [32], and knockout of *Tet* genes in mice yields developmental phenotypes of varying severities,  
558 with knockout of all three *Tets* together being embryonic lethal [41,42,46,47]. Similarly, OGT is  
559 absolutely essential for development in mice [48] and zebrafish [49], though its vast number of  
560 targets have made it difficult to narrow down more specifically why OGT is necessary. Our  
561 results suggest that TETs are important OGT targets in development.

562

### 563 **The TET1-OGT interaction regulates TET-containing complexes and gene expression in mESCs**

564 The D2018A mutation reduced the TET1-OGT interaction in mESCs and altered all 3 TET  
565 containing high molecular weight complexes. While these changes did not correlate with  
566 alterations in bulk 5hmC levels, the distribution of 5mC was altered. The region of TET1 that is  
567 necessary and sufficient for interaction with OGT is highly conserved with the other TETs and  
568 perturbing the interaction between OGT and TET1 altered the abundance of TET2 and TET3 in  
569 high molecular weight complexes. Together these data suggest that OGT may be equilibrating  
570 between the three TET-containing complexes. The size of the complexes in which TETs are



571 found (>670kDa) are larger than would be expected if the only components are a TET protein,  
572 OGT, and HCF1, suggesting that additional proteins or more than one molecule of OGT, HCF1,  
573 or TET are present. A thorough study of the factors that comprise these complexes, as well as  
574 how the TET1 D2018A mutation alters the architecture of these complexes and the epigenetic  
575 status of the genome will yield valuable insights into how the TET1-OGT interaction regulates  
576 gene expression in mESCs.

577 The D2018A mutation caused a large increase in the levels of TET2, which may explain  
578 why bulk 5hmC levels are unaltered when the TET1-OGT interaction is decreased. TET1 and  
579 TET2 regulate different genomic regions in mESCs[44], and redistribution of TET2 to TET1  
580 targets may contribute to the altered distribution of 5mC and gene expression seen in the  
581 D2018A mESCs. The magnitude of gene expression changes (nearly one quarter of genes  
582 changed 2-fold or more) and striking alteration in 5mC distribution induced by a single amino  
583 acid substitution demonstrates the importance of the TET1-OGT interaction in regulation of the  
584 transcriptome and epigenome. Further study of how 5mC/5hmC levels and distribution are  
585 controlled by the TET1-OGT interaction will provide insight into how this nutrient-sensing post-  
586 translational modification enzyme can regulate the epigenome.

587

### 588 **A connection between metabolism and the epigenome**

589 OGT has been proposed to act as a metabolic sensor because its cofactor, UDP-GlcNAc,  
590 is synthesized via the hexosamine biosynthetic pathway (HBP), which is fed by pathways  
591 metabolizing glucose, amino acids, fatty acids, and nucleotides [24]. UDP-GlcNAc levels change  
592 in response to flux through these pathways [50-52], leading to the hypothesis that OGT activity  
593 may vary in response to the nutrient status of the cell. Thus the enhancement of TET1 activity  
594 by OGT and the significant overlap of the two enzymes on chromatin [26] suggest a model in  
595 which OGT may regulate the epigenome in response to nutrient status by controlling TET1  
596 activity (Fig. 8).

597

598

### 599 **Acknowledgments**

600 We thank Miguel Ramalho-Santos for the FLAG-TET1 CD plasmid and Suzanne Walker  
601 for the His-OGT plasmid. We thank Leanne Goodrich, Richard Yan, Myles Hochman, Sy  
602 Redding, Walter Eckalbar, and Andrea Barczak for technical assistance. We thank all members  
603 of the Panning lab for valuable ideas and discussion. This work was supported by R01  
604 GM088506 (BP), NCI grant P30 CA008748 (MG), and funding from the Geoffrey Beene Cancer  
605 Research Center of Memorial Sloan-Kettering Cancer Center (MG). JH was supported by the  
606 California Institute for Regenerative Medicine Predoctoral Fellowship TG2-01153.

607

608

### 609 **Competing Financial Interests**

610 The authors declare no competing financial interests.

611

612

### 613 **References**

614



- 615 1. Guibert S, Weber M. Functions of DNA methylation and hydroxymethylation in  
616 mammalian development. *Curr Top Dev Biol*. Elsevier; 2013;104:47–83.
- 617 2. Smith ZD, Meissner A. DNA methylation: roles in mammalian development. *Nature*  
618 *Reviews Genetics*. 2013 Mar;14(3):204–20.
- 619 3. Tahiliani M, Koh KP, Shen Y, Pastor WA, Bandukwala H, Brudno Y, Agarwal S, Iyer LM, Liu  
620 DR, Aravind L, Rao A. Conversion of 5-Methylcytosine to 5-Hydroxymethylcytosine in  
621 Mammalian DNA by MLL Partner TET1. *Science*. 2009 May 14;324(5929):930–5.
- 622 4. Ito S, D’Alessio AC, Taranova OV, Hong K, Sowers LC, Zhang Y. Role of Tet proteins in 5mC  
623 to 5hmC conversion, ES-cell self-renewal and inner cell mass specification. *Nature*. 2010  
624 Aug 26;466(7310):1129–33.
- 625 5. Kriaucionis S, Heintz N. The nuclear DNA base 5-hydroxymethylcytosine is present in  
626 Purkinje neurons and the brain. *Science*. 2009 May 15;324(5929):929–30.
- 627 6. He Y-F, Li B-Z, Li Z, Liu P, Wang Y, Tang Q, Ding J, Jia Y, Chen Z, Li L, Sun Y, Li X, Dai Q, Song  
628 C-X, Zhang K, He C, Xu G-L. Tet-mediated formation of 5-carboxylcytosine and its excision  
629 by TDG in mammalian DNA. *Science*. 2011 Sep 2;333(6047):1303–7.
- 630 7. Ito S, Shen L, Dai Q, Wu SC, Collins LB, Swenberg JA, He C, Zhang Y. Tet proteins can  
631 convert 5-methylcytosine to 5-formylcytosine and 5-carboxylcytosine. *Science*. 2011 Sep  
632 2;333(6047):1300–3.
- 633 8. Guo JU, Su Y, Zhong C, Ming G-L, Song H. Hydroxylation of 5-methylcytosine by TET1  
634 promotes active DNA demethylation in the adult brain. *Cell*. 2011 Apr 29;145(3):423–34.
- 635 9. Cortellino S, Xu J, Sannai M, Moore R, Caretti E, Cigliano A, Le Coz M, Devarajan K,  
636 Wessels A, Soprano D, Abramowitz LK, Bartolomei MS, Rambow F, Bassi MR, Bruno T,  
637 Fanciulli M, Renner C, Klein-Szanto AJ, Matsumoto Y, Kobi D, Davidson I, Alberti C, Larue  
638 L, Bellacosa A. Thymine DNA glycosylase is essential for active DNA demethylation by  
639 linked deamination-base excision repair. *Cell*. 2011 Jul 8;146(1):67–79.
- 640 10. Gao Y, Chen J, Li K, Wu T, Huang B, Liu W, Kou X, Zhang Y, Huang H, Jiang Y, Yao C, Liu X,  
641 Lu Z, Xu Z, Kang L, Chen J, Wang H, Cai T, Gao S. Replacement of Oct4 by Tet1 during iPSC  
642 induction reveals an important role of DNA methylation and hydroxymethylation in  
643 reprogramming. *Cell Stem Cell*. 2013 Apr 4;12(4):453–69.
- 644 11. Weber AR, Krawczyk C, Robertson AB, Kuśnierczyk A, Vågbø CB, Schuermann D,  
645 Klungland A, Schär P. Biochemical reconstitution of TET1-TDG-BER-dependent active DNA  
646 demethylation reveals a highly coordinated mechanism. *Nature Communications*. 2016  
647 Mar 2;7:10806.
- 648 12. Bachman M, Uribe-Lewis S, Yang X, Williams M, Murrell A, Balasubramanian S. 5-  
649 Hydroxymethylcytosine is a predominantly stable DNA modification. *Nature Chemistry*.

- 650 2014 Dec;6(12):1049–55.
- 651 13. Bachman M, Uribe-Lewis S, Yang X, Burgess HE, Iurlaro M, Reik W, Murrell A,  
652 Balasubramanian S. 5-Formylcytosine can be a stable DNA modification in mammals.  
653 Nature Publishing Group. 2015 Aug;11(8):555–7.
- 654 14. Spruijt CG, Gnerlich F, Smits AH, Pfaffeneder T, Jansen PWTC, Bauer C, Münzel M,  
655 Wagner M, Müller M, Khan F, Eberl HC, Mensinga A, Brinkman AB, Lephikov K, Müller U,  
656 Walter J, Boelens R, van Ingen H, Leonhardt H, Carell T, Vermeulen M. Dynamic readers  
657 for 5-(hydroxy)methylcytosine and its oxidized derivatives. *Cell*. 2013 Feb  
658 28;152(5):1146–59.
- 659 15. Haltiwanger RS, Holt GD, Hart GW. Enzymatic addition of O-GlcNAc to nuclear and  
660 cytoplasmic proteins. Identification of a uridine diphospho-N-acetylglucosamine:peptide  
661 beta-N-acetylglucosaminyltransferase. *Journal of Biological Chemistry*. 1990 Feb  
662 15;265(5):2563–8.
- 663 16. Hanover JA, Krause MW, Love DC. Bittersweet memories: linking metabolism to  
664 epigenetics through O-GlcNAcylation. *Nat Rev Mol Cell Biol*. 2012 Apr 23;13(5):312–21.
- 665 17. Maynard JC, Burlingame AL, Medzihradszky KF. Cysteine S-linked N-acetylglucosamine (S-  
666 GlcNAcylation), A New Post-translational Modification in Mammals. *Molecular & Cellular*  
667 *Proteomics*. 2016 Nov 1;15(11):3405–11.
- 668 18. Lewis BA, Hanover JA. O-GlcNAc and the epigenetic regulation of gene expression. *J Biol*  
669 *Chem*. 2014 Dec 12;289(50):34440–8.
- 670 19. Hardivillé S, Hart GW. Nutrient regulation of gene expression by O-GlcNAcylation of  
671 chromatin. *Current Opinion in Chemical Biology*. 2016 Aug;33:88–94.
- 672 20. Bullen JW, Balsbaugh JL, Chanda D, Shabanowitz J, Hunt DF, Neumann D, Hart GW. Cross-  
673 talk between two essential nutrient-sensitive enzymes: O-GlcNAc transferase (OGT) and  
674 AMP-activated protein kinase (AMPK). *J Biol Chem*. 2014 Apr 11;289(15):10592–606.
- 675 21. Ruan H-B, Singh JP, Li M-D, Wu J, Yang X. Cracking the O-GlcNAc code in metabolism.  
676 *Trends Endocrinol Metab*. 2013 Jun;24(6):301–9.
- 677 22. Durning SP, Flanagan-Steet H, Prasad N, Wells L. O-Linked  $\beta$ -N-acetylglucosamine (O-  
678 GlcNAc) Acts as a Glucose Sensor to Epigenetically Regulate the Insulin Gene in  
679 Pancreatic Beta Cells. *J Biol Chem*. 2016 Jan 29;291(5):2107–18.
- 680 23. Hanover JA, Forsythe ME, Hennessey PT, Brodigan TM, Love DC, Ashwell G, Krause M. A  
681 *Caenorhabditis elegans* model of insulin resistance: altered macronutrient storage and  
682 dauer formation in an OGT-1 knockout. *Proceedings of the National Academy of*  
683 *Sciences*. 2005 Aug 9;102(32):11266–71.

- 684 24. Hart GW, Slawson C, Ramirez-Correa G, Lagerlof O. Cross talk between O-GlcNAcylation  
685 and phosphorylation: roles in signaling, transcription, and chronic disease. *Annu Rev*  
686 *Biochem.* 2011;80:825–58.
- 687 25. Levine ZG, Walker S. The Biochemistry of O-GlcNAc Transferase: Which Functions Make It  
688 Essential in Mammalian Cells? *Annu Rev Biochem.* 2016 Jun 2;85:631–57.
- 689 26. Vella P, Scelfo A, Jammula S, Chiacchiera F, Williams K, Cuomo A, Roberto A, Christensen  
690 J, Bonaldi T, Helin K, Pasini D. Tet proteins connect the O-linked N-acetylglucosamine  
691 transferase Ogt to chromatin in embryonic stem cells. *Molecular Cell.* 2013 Feb  
692 21;49(4):645–56.
- 693 27. Deplus R, Delatte B, Schwinn MK, Defrance M, Méndez J, Murphy N, Dawson MA,  
694 Volkmar M, Putmans P, Calonne E, Shih AH, Levine RL, Bernard O, Mercher T, Solary E,  
695 Urh M, Daniels DL, Fuks F. TET2 and TET3 regulate GlcNAcylation and H3K4 methylation  
696 through OGT and SET1/COMPASS. *The EMBO Journal.* 2013 Mar 6;32(5):645–55.
- 697 28. Chen Q, Chen Y, Bian C, Fujiki R, Yu X. TET2 promotes histone O-GlcNAcylation during  
698 gene transcription. *Nature.* 2013 Jan 24;493(7433):561–4.
- 699 29. Shi F-T, Kim H, Lu W, He Q, Liu D, Goodell MA, Wan M, Songyang Z. Ten-eleven  
700 translocation 1 (Tet1) is regulated by O-linked N-acetylglucosamine transferase (Ogt) for  
701 target gene repression in mouse embryonic stem cells. *J Biol Chem.* 2013 Jul  
702 19;288(29):20776–84.
- 703 30. Ran FA, Hsu PD, Wright J, Agarwala V, Scott DA, Zhang F. Genome engineering using the  
704 CRISPR-Cas9 system. *Nature Protocols.* 2013 Oct 24;8(11):2281–308.
- 705 31. Howe B, Umrigar A, Tsien F. Chromosome Preparation From Cultured Cells. *JoVE.*  
706 2014;(83):1–5.
- 707 32. Li C, Lan Y, Schwartz-Orbach L, Korol E, Tahiliani M, Evans T, Goll MG. Overlapping  
708 Requirements for Tet2 and Tet3 in Normal Development and Hematopoietic Stem Cell  
709 Emergence. *CellReports.* 2015 Aug 18;12(7):1133–43.
- 710 33. Kaley-Zylinska ML, Horsfield JA, Flores MVC, Postlethwait JH, Vitas MR, Baas AM, Crosier  
711 PS, Crosier KE. Runx1 is required for zebrafish blood and vessel development and  
712 expression of a human RUNX1-CBF2T1 transgene advances a model for studies of  
713 leukemogenesis. *Development.* 2002 Apr;129(8):2015–30.
- 714 34. Thisse C, Thisse B. High-resolution in situ hybridization to whole-mount zebrafish  
715 embryos. *Nature Protocols.* 2008;3(1):59–69.
- 716 35. Ito R, Katsura S, Shimada H, Tsuchiya H, Hada M, Okumura T, Sugawara A, Yokoyama A.  
717 TET3-OGT interaction increases the stability and the presence of OGT in chromatin.  
718 *Genes Cells.* 2014 Jan;19(1):52–65.

- 719 36. Yamaguchi S, Shen L, Liu Y, Sandler D, Zhang Y. Role of Tet1 in erasure of genomic  
720 imprinting. *Nature*. 2013 Dec 19;504(7480):460–4.
- 721 37. Hu L, Li Z, Cheng J, Rao Q, Gong W, Liu M, Shi YG, Zhu J, Wang P, Xu Y. Crystal structure of  
722 TET2-DNA complex: insight into TET-mediated 5mC oxidation. *Cell*. 2013 Dec  
723 19;155(7):1545–55.
- 724 38. Williams K, Christensen J, Pedersen MT, Johansen JV, Cloos PAC, Rappsilber J, Helin K.  
725 TET1 and hydroxymethylcytosine in transcription and DNA methylation fidelity. *Nature*.  
726 2011 May 19;473(7347):343–8.
- 727 39. Myers SA, Panning B, Burlingame AL. Polycomb repressive complex 2 is necessary for the  
728 normal site-specific O-GlcNAc distribution in mouse embryonic stem cells. *Proceedings of*  
729 *the National Academy of Sciences*. 2011 Jun 7;108(23):9490–5.
- 730 40. Koh KP, Yabuuchi A, Rao S, Huang Y, Cunniff K, Nardone J, Laiho A, Tahiliani M, Sommer  
731 CA, Mostoslavsky G, Lahesmaa R, Orkin SH, Rodig SJ, Daley GQ, Rao A. Tet1 and Tet2  
732 regulate 5-hydroxymethylcytosine production and cell lineage specification in mouse  
733 embryonic stem cells. *Cell Stem Cell*. 2011 Feb 4;8(2):200–13.
- 734 41. Dawlaty MM, Ganz K, Powell BE, Hu Y-C, Markoulaki S, Cheng AW, Gao Q, Kim J, Choi S-  
735 W, Page DC, Jaenisch R. Tet1 is dispensable for maintaining pluripotency and its loss is  
736 compatible with embryonic and postnatal development. *Cell Stem Cell*. 2011 Aug  
737 5;9(2):166–75.
- 738 42. Li Z, Cai X, Cai C-L, Wang J, Zhang W, Petersen BE, Yang F-C, Xu M. Deletion of Tet2 in  
739 mice leads to dysregulated hematopoietic stem cells and subsequent development of  
740 myeloid malignancies. *Blood*. 2011 Oct 27;118(17):4509–18.
- 741 43. Zhao Z, Chen L, Dawlaty MM, Pan F, Weeks O, Zhou Y, Cao Z, Shi H, Wang J, Lin L, Chen S,  
742 Yuan W, Qin Z, Ni H, Nimer SD, Yang F-C, Jaenisch R, Jin P, Xu M. Combined Loss of Tet1  
743 and Tet2 Promotes B Cell, but Not Myeloid Malignancies, in Mice. *CellReports*. 2015 Nov  
744 24;13(8):1692–704.
- 745 44. Huang Y, Chavez L, Chang X, Wang X, Pastor WA, Kang J, Zepeda-Martinez JA, Pape UJ,  
746 Jacobsen SE, Peters B, Rao A. Distinct roles of the methylcytosine oxidases Tet1 and Tet2  
747 in mouse embryonic stem cells. *Proceedings of the National Academy of Sciences*. 2014  
748 Jan 28;111(4):1361–6.
- 749 45. Fidalgo M, Huang X, Guallar D, Sanchez-Priego C, Valdes VJ, Saunders A, Ding J, Wu W-S,  
750 Clavel C, Wang J. Zfp281 Coordinates Opposing Functions of Tet1 and Tet2 in Pluripotent  
751 States. *Cell Stem Cell*. 2016 Sep 1;19(3):355–69.
- 752 46. Dawlaty MM, Breiling A, Le T, Raddatz G, Barrasa MI, Cheng AW, Gao Q, Powell BE, Li Z,  
753 Xu M, Faull KF, Lyko F, Jaenisch R. Combined deficiency of Tet1 and Tet2 causes  
754 epigenetic abnormalities but is compatible with postnatal development. *Developmental*

- 755 Cell. 2013 Feb 11;24(3):310–23.
- 756 47. Dawlaty M. Loss of Tet Enzymes Compromises Proper Differentiation of Embryonic Stem  
757 Cells. 2014 Mar 13;:1–8.
- 758 48. Shafi R, Iyer SPN, Ellies LG, O'Donnell N, Marek K, Chiu D, Hart GW, Marth JD. The O-  
759 GlcNAc transferase gene resides on the X chromosome and is essential for  
760 embryonic stem cell viability and mouse ontogeny. Proceedings of the National Academy  
761 of Sciences. 2000 May 23;97(11):5735–9.
- 762 49. Webster DM, Webster DM, Teo C, Teo C, Sun Y, Sun Y, Wloga D, Wloga D, Gay S, Gay S,  
763 Klonowski KD, Klonowski KD, Wells L, Dougan ST, Dougan ST. O-GlcNAc modifications  
764 regulate cell survival and epiboly during zebrafish development. BMC Dev Biol.  
765 2009;9(1):28.
- 766 50. Marshall S, Nadeau O, Yamasaki K. Dynamic Actions of Glucose and Glucosamine on  
767 Hexosamine Biosynthesis in Isolated Adipocytes: DIFFERENTIAL EFFECTS ON  
768 GLUCOSAMINE 6-PHOSPHATE, UDP-N-ACETYLGLUCOSAMINE, AND ATP LEVELS. Journal  
769 of Biological Chemistry. 2004 Aug 13;279(34):35313–9.
- 770 51. McClain DA. Hexosamines as mediators of nutrient sensing and regulation in diabetes.  
771 Journal of Diabetes and its Complications. 2002 Feb 20;16:72–80.
- 772 52. Weigert C, Klopfer K, Kausch C, Brodbeck K, Stumvoll M, Haring H, Schleicher E.  
773 Palmitate-Induced Activation of the Hexosamine Pathway in Human Myotubes Increased  
774 Expression of Glutamine:Fructose-6-Phosphate Aminotransferase. Diabetes. 2003 Mar  
775 6;52:1–7.
- 776
- 777
- 778
- 779
- 780
- 781
- 782
- 783
- 784
- 785
- 786
- 787
- 788
- 789
- 790
- 791

# Figure 1

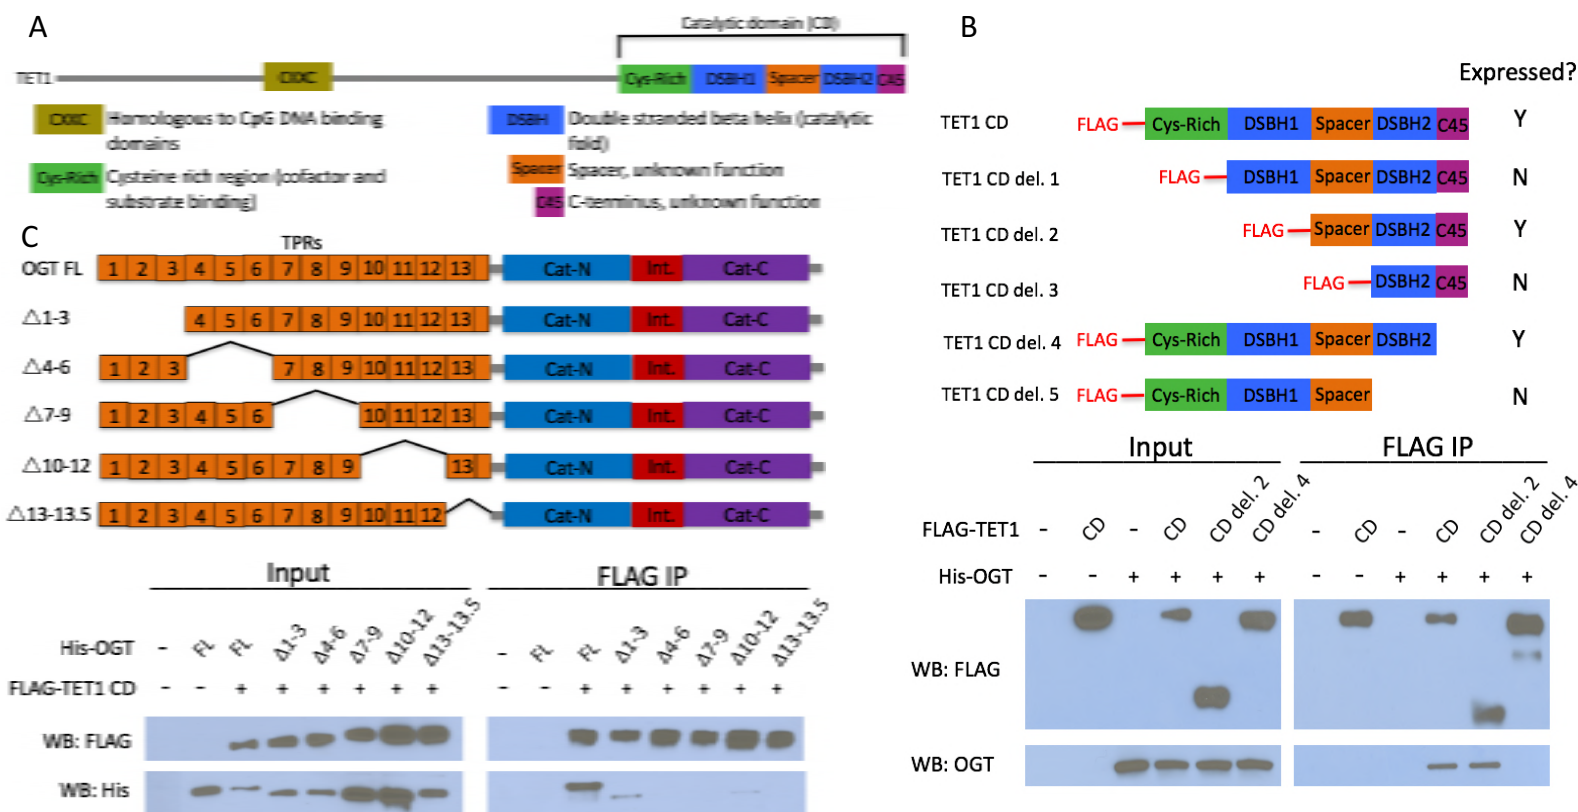

**Fig. 1: The short TET1 C-terminus is required for interaction with OGT**

A) Domain architecture of TET1. B) Diagram of FLAG-tagged TET1 CD constructs expressed in HEK293T cells (upper). FLAG and OGT western blot of inputs and FLAG IPs from HEK293T cells transiently expressing FLAG-TET1 CD truncations and His-OGT (lower). C) Diagram of His-tagged OGT constructs expressed in HEK293T cells (upper). FLAG and His western blot of input and FLAG IPs from HEK293T cells transiently expressing FLAG-TET1 CD and His-OGT TPR deletions (lower).



# Figure 1 – figure supplement 1

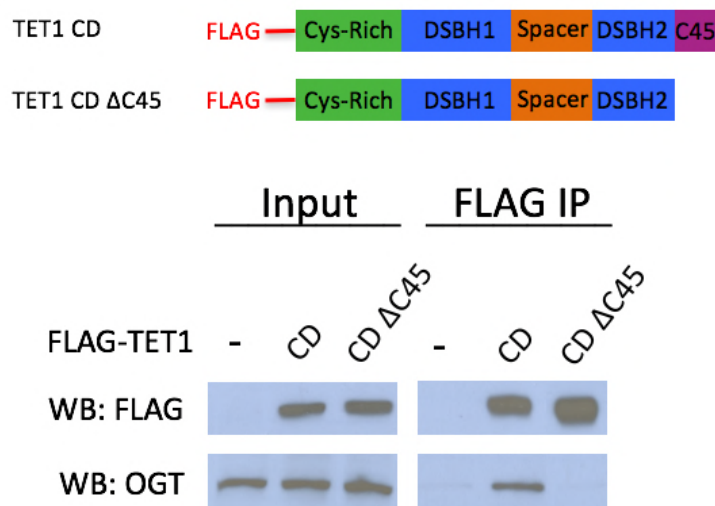

**Fig. 1 supplement 1: TET1 C45 is necessary for interaction with endogenous OGT**  
FLAG and OGT western blot of inputs and FLAG IPs from HEK293T cells transiently expressing FLAG-TET1 CD or FLAG-TET1 CD ΔC45 (diagrammed in the upper panel).

## Figure 2

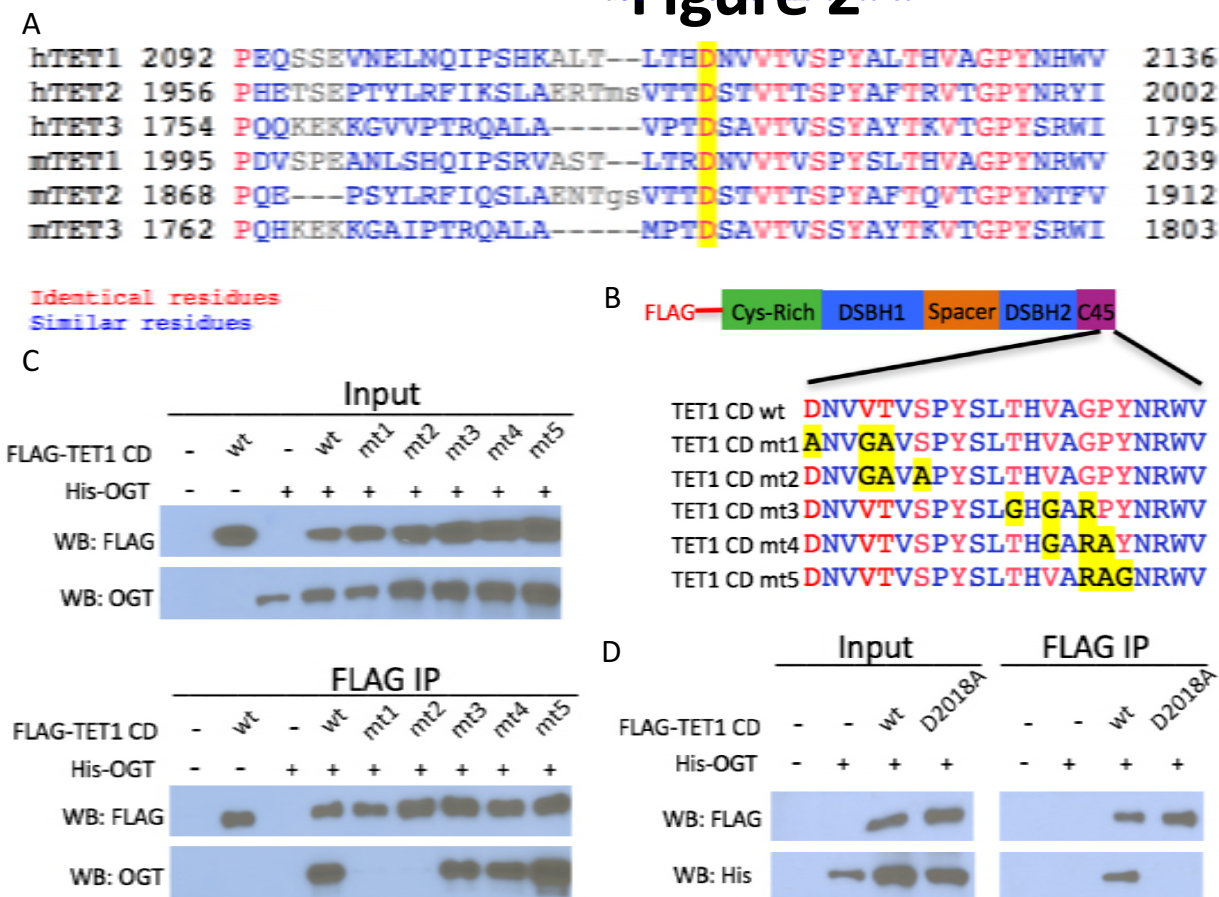

**Fig. 2: Conserved residues in the TET1 C45 are necessary for the TET1-OGT interaction**  
A) Alignment of the C-termini of human (h) and mouse (m) TETs 1, 2, and 3. A conserved aspartate residue mutated in D is highlighted. B) Diagram of FLAG-tagged TET1 CD constructs expressed in HEK293T cells. C) FLAG and OGT western blot of inputs and FLAG IPs from HEK293T cells transiently expressing FLAG-TET1 CD triple point mutants and His-OGT. D) FLAG and OGT western blot of inputs and FLAG IPs from HEK293T cells transiently expressing His-OGT and FLAG-TET1 CD or FLAG-TET1 CD D2018A.

## Figure 3

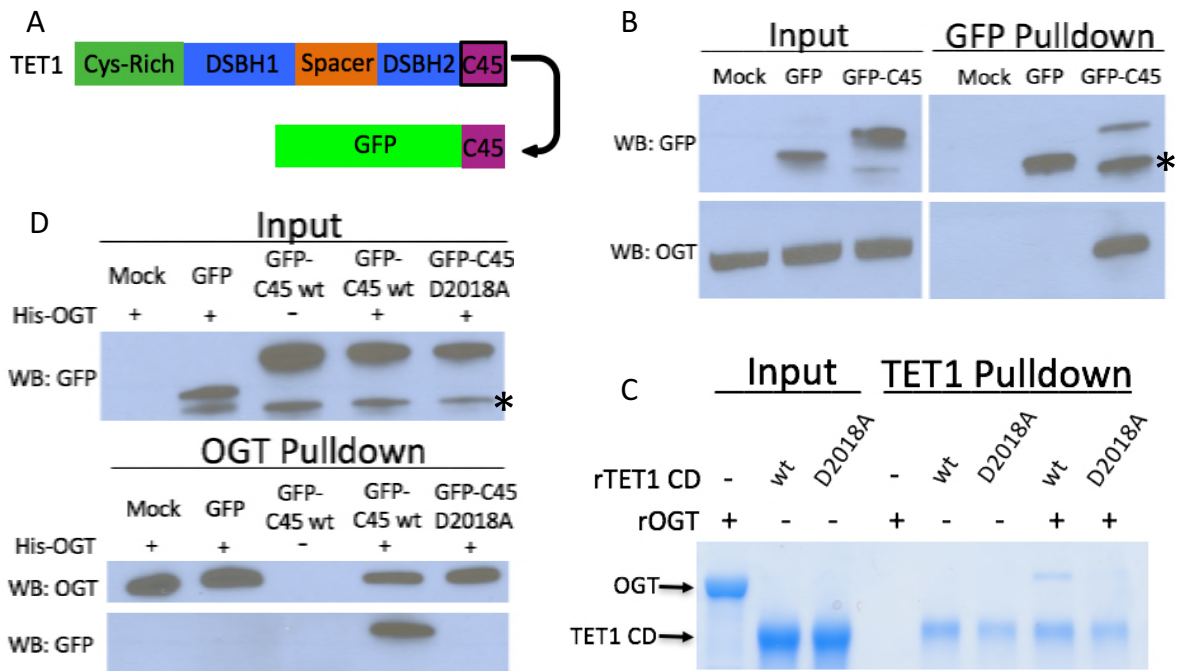

**Fig. 3: The TET1 C45 is sufficient for interaction with OGT in cells and *in vitro***

A) Schematic of the TET1 C45 fusion to the C-terminus of GFP. B) GFP and OGT western blot of inputs and GFP IPs from HEK293T cells transiently expressing GFP or GFP-TET1 C45. \*Truncated GFP. C) Coomassie stained protein gel of inputs and TET1 IPs from *in vitro* binding reactions containing rOGT and rTET1 CD wild type or D2018A. No UDP-GlcNAc was included in these reactions. D) GFP and OGT western blot of inputs and OGT IPs from *in vitro* binding reactions containing rOGT and *in vitro* translated GFP constructs. \*Truncated GFP.

## Figure 4

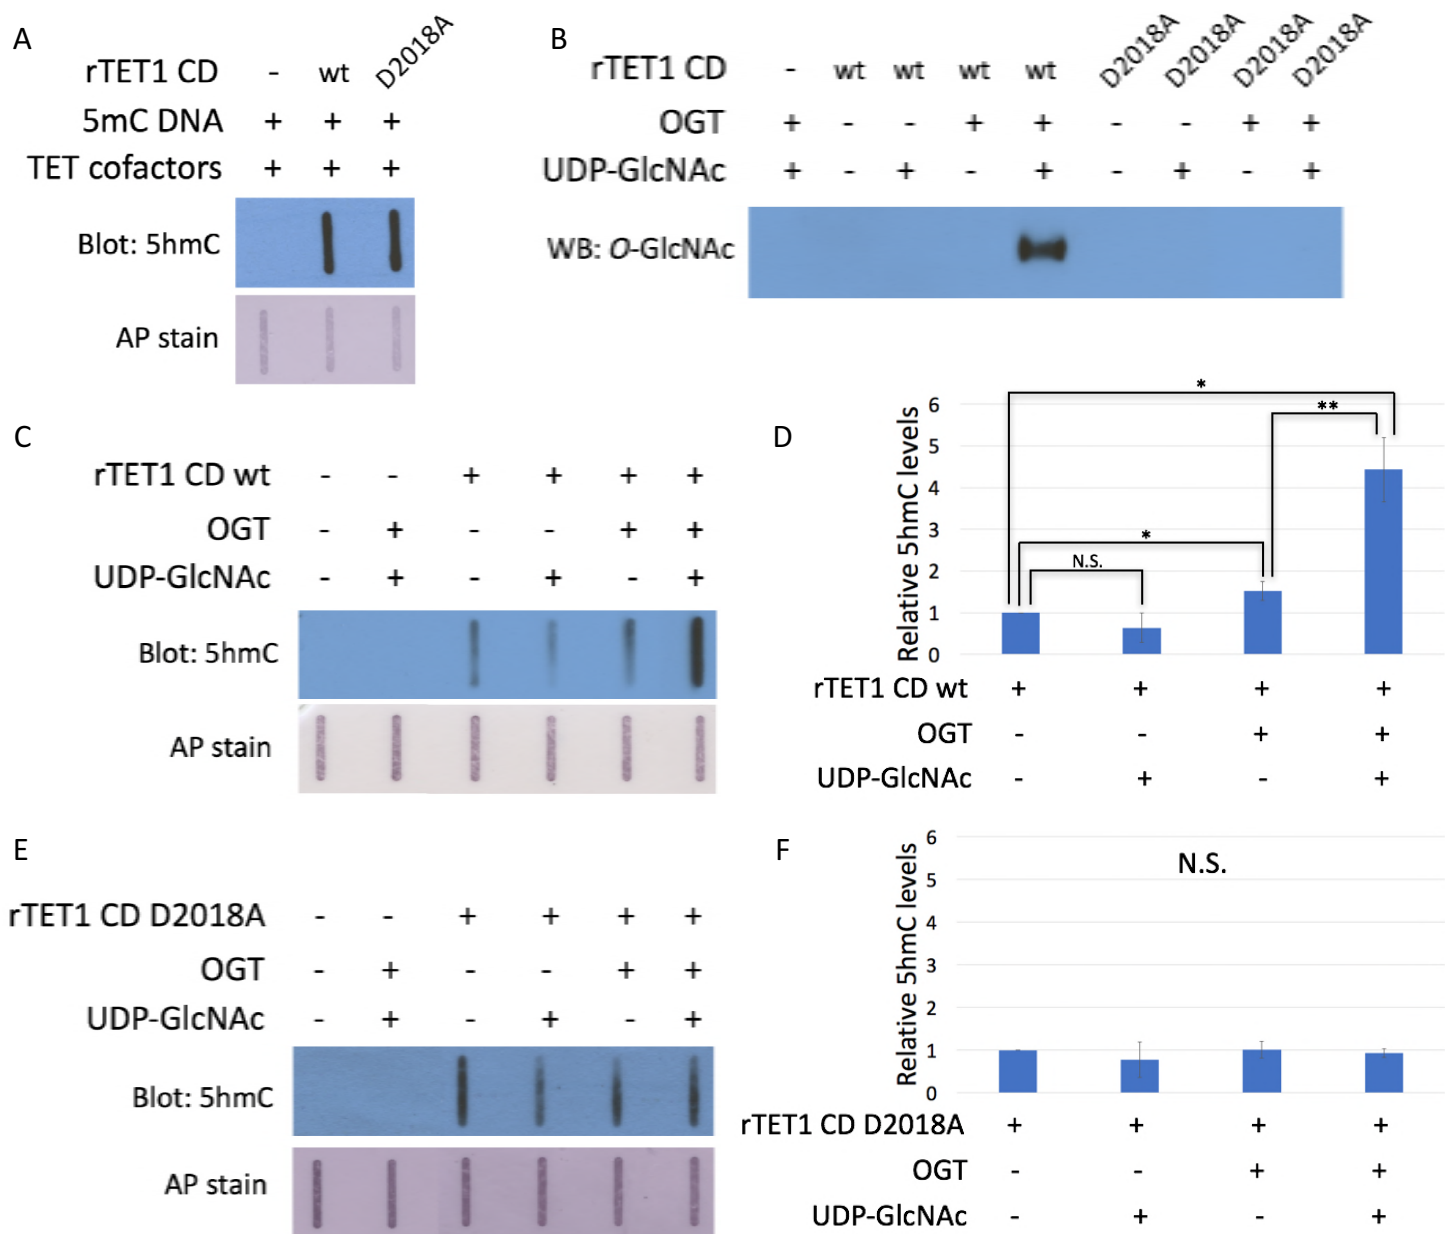

**Fig. 4: The D2018A mutation impairs TET1 CD stimulation by OGT**

A) 5hmC slot blot of biotinylated 5mC containing lambda DNA from rTET1 CD activity assays. Alkaline phosphatase staining was used to detect biotin as a loading control. B) Western blot for O-GlcNAc in *in vitro* O-GlcNAcylation reactions. C) 5hmC slot blot of biotinylated 5mC containing lambda DNA from rTET1 wt activity assays. Alkaline phosphatase staining was used to detect biotin as a loading control. D) Quantification of 5hmC levels from rTET1 wt activity assays. Results are from 3-5 slot blots and normalized to rTET1 wt alone. E) 5hmC slot blot of biotinylated 5mC containing lambda DNA from rD2018A activity assays. Alkaline phosphatase staining was used to detect biotin as a loading control. F) Quantification of 5hmC levels from rD2018A activity assays. Results are from 3-5 slot blots and normalized to rD2018A alone. Error bars denote s.d. \*P<0.01, \*\*P<0.01, N.S. – not significant.

## Figure 5

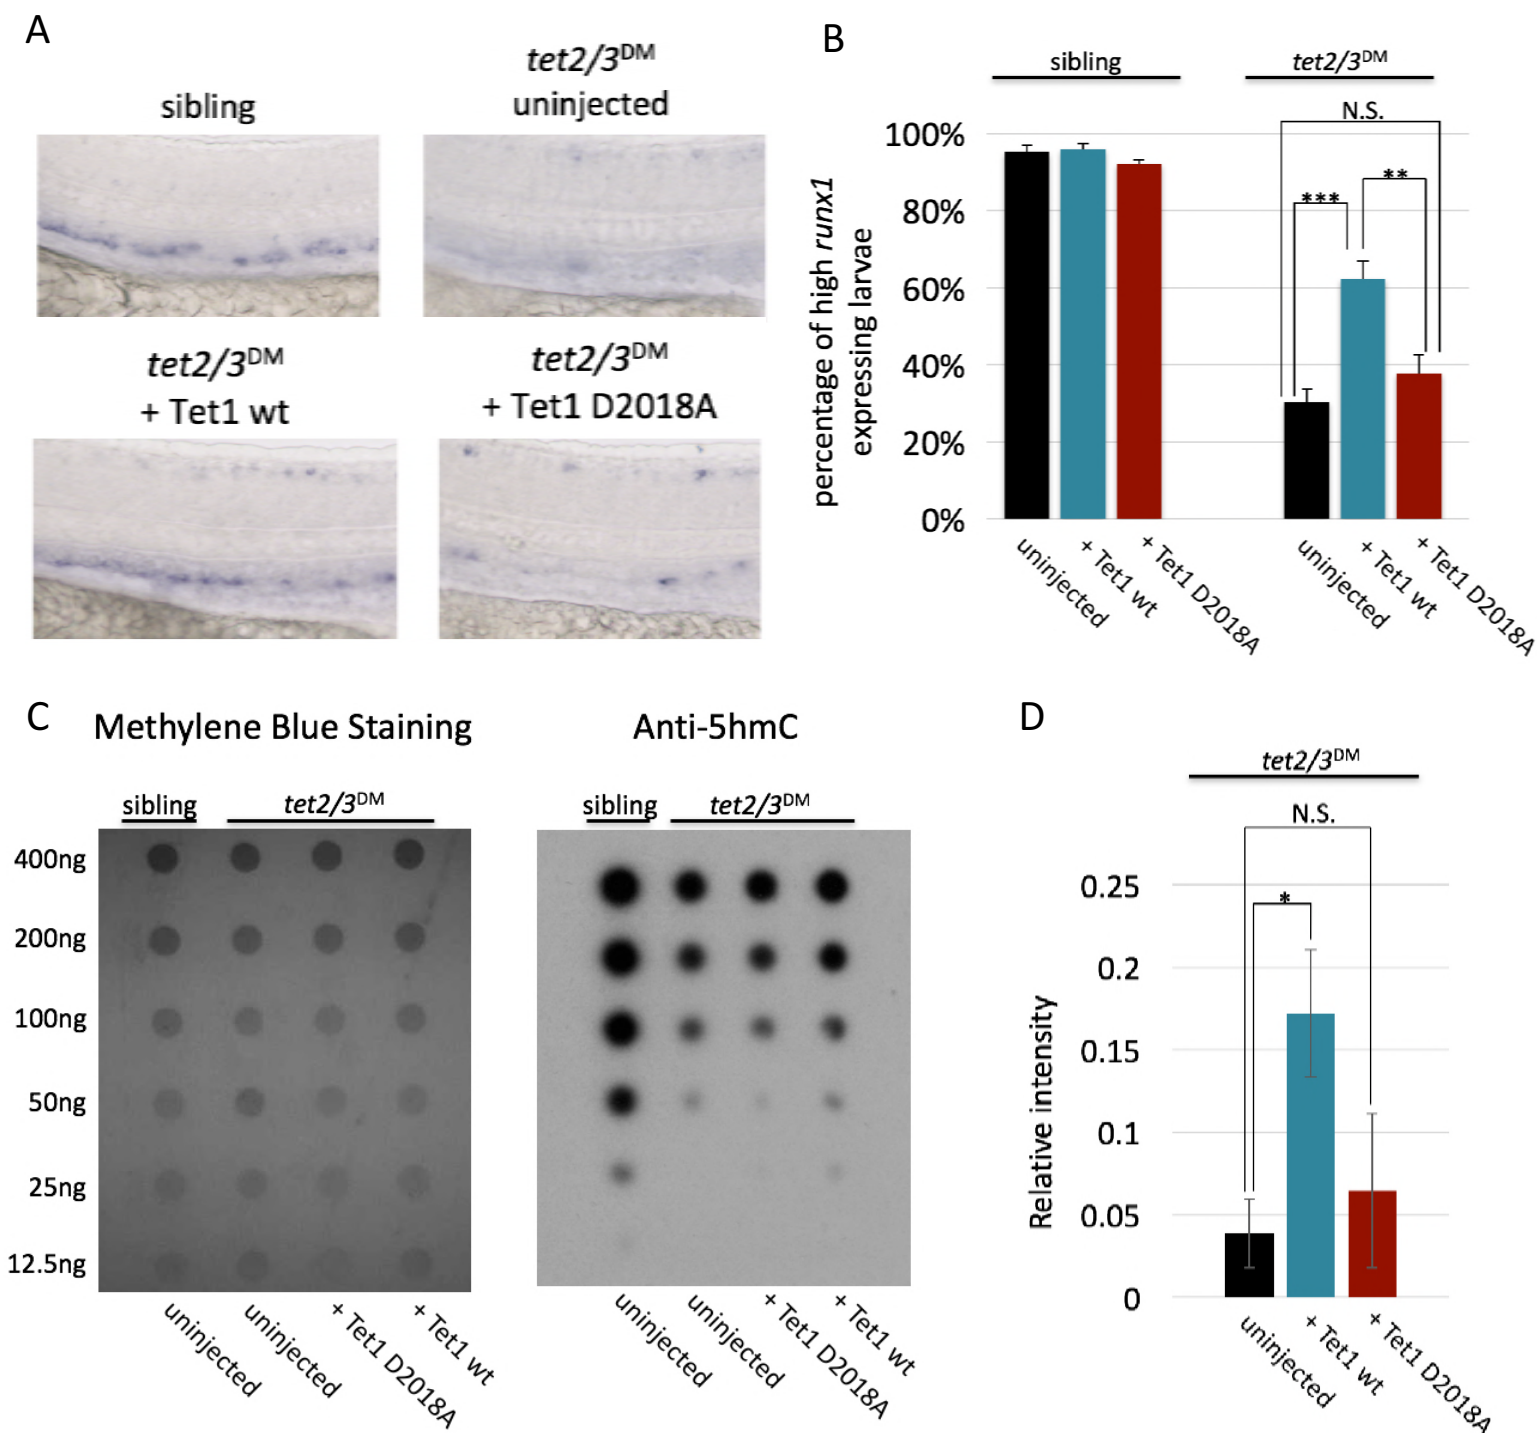

### Fig. 5: The TET1-OGT interaction promotes TET1 function in the zebrafish embryo

A) Representative images of *runx1* labeling in the dorsal aorta of wild type or *tet2/3<sup>DM</sup>* zebrafish embryos, uninjected or injected with mRNA encoding mouse Tet1 wild type or D2018A. B) Percentage of embryos with high *runx1* expression along the dorsal aorta (\* $P < 0.05$ , \*\* $P < 0.01$ , \*\*\* $P < 0.001$ , N.S. – not significant). C) 5hmC dot blot of genomic DNA from wild type or *tet2/3<sup>DM</sup>* zebrafish embryos injected with Tet1 wild type or D2018A mRNA. Methylene blue was used as a loading control. D) Quantification of 5hmC levels from 3 dot blots, normalized to methylene blue staining (\* $P < 0.05$ , \*\* $P < 0.01$ , \*\*\* $P < 0.001$ , N.S. – not significant).



# Figure 6

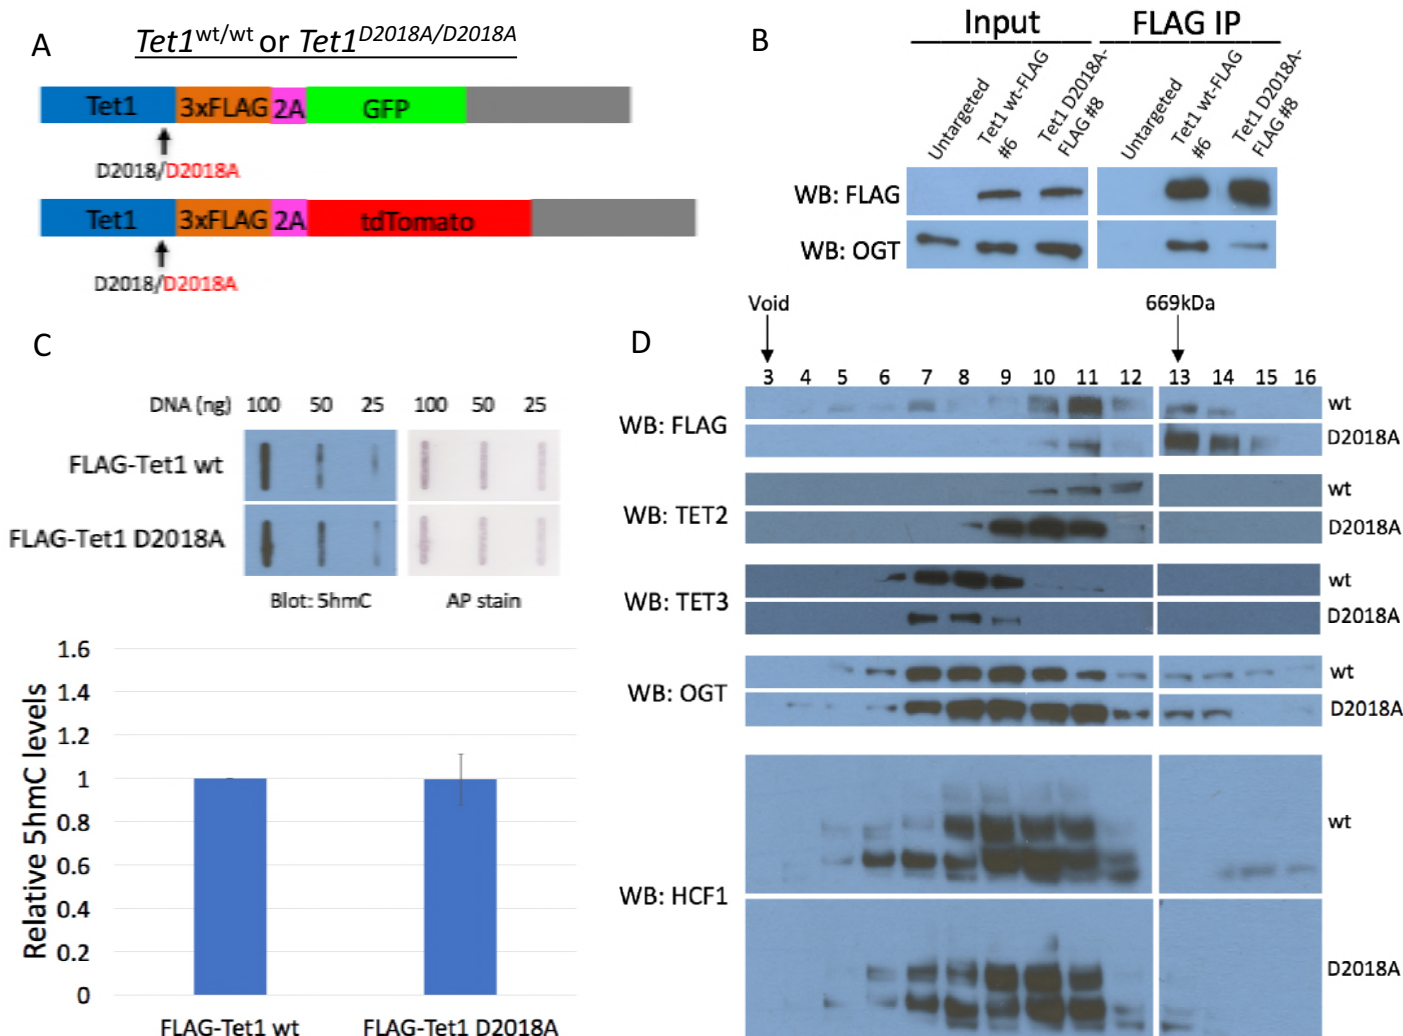

**Fig. 6: The D2018A mutation alters TET-containing complexes in mESCs**

A) Schematic of WT-FLAG and D2018A-FLAG mESC lines. B) FLAG and OGT western blot of inputs and FLAG IPs from WT-FLAG and D2018A-FLAG mESCs. C) (Upper) Representative 5hmC slot blot of 25-100ng genomic DNA from WT-FLAG and D2018A-FLAG mESCs. Equal amounts of biotinylated plasmid DNA were added to each gDNA stock and diluted across the dilution series. Alkaline phosphatase staining was used to detect biotin as a loading and dilution control. (Lower) relative levels of 5hmC in WT-FLAG and D2018A-FLAG mESCs from four independent slot blots. D) Western blots for FLAG, TET2, TET3, OGT, and HCF1 of nuclear extracts from WT-FLAG and D2018A-FLAG mESCs fractionated on a Superose 6 size exclusion column. Fraction numbers are indicated.



# Figure 6 – figure supplement 1

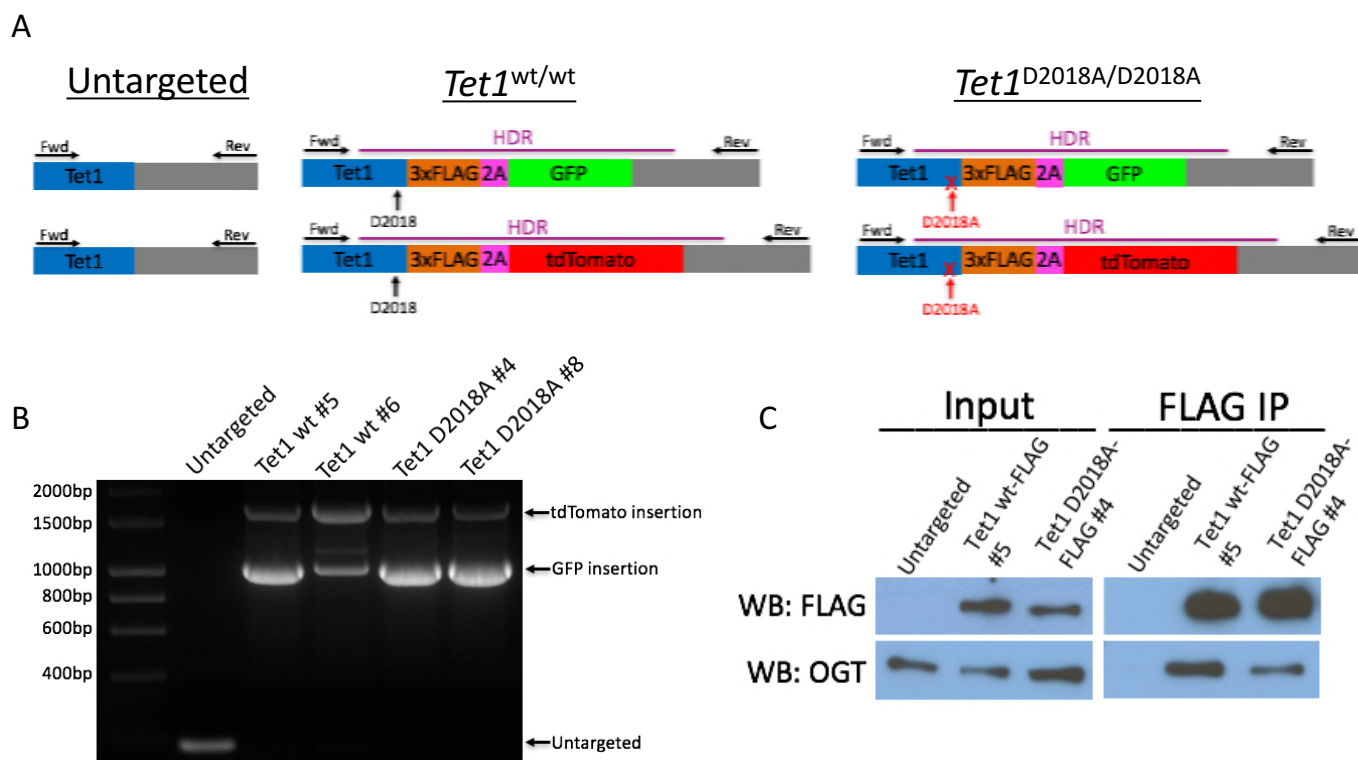

## Fig. 6 supplement 1: Generation of mESC lines

A) Schematic of mESC lines. DNA encoding a 3xFLAG tag was added to the 3' end of both alleles of *Tet1*, followed by a 2A sequence and a fluorescent protein (GFP or tdTomato). The 2A sequence causes ribosome skipping, resulting in separate translation of TET1-3xFLAG and 2A-GFP or 2A-tdTomato. Purple line: template used for homology-directed repair (HDR). Horizontal arrows: primers used for PCR genotyping. Vertical arrows: D2018 residue. B) PCR genotyping of independently derived, clonal, targeted mESC lines using primers indicated in A. C) FLAG and OGT western blot of inputs and FLAG IPs from another pair of WT-FLAG and D2018A-FLAG mESCs.

# Figure 7

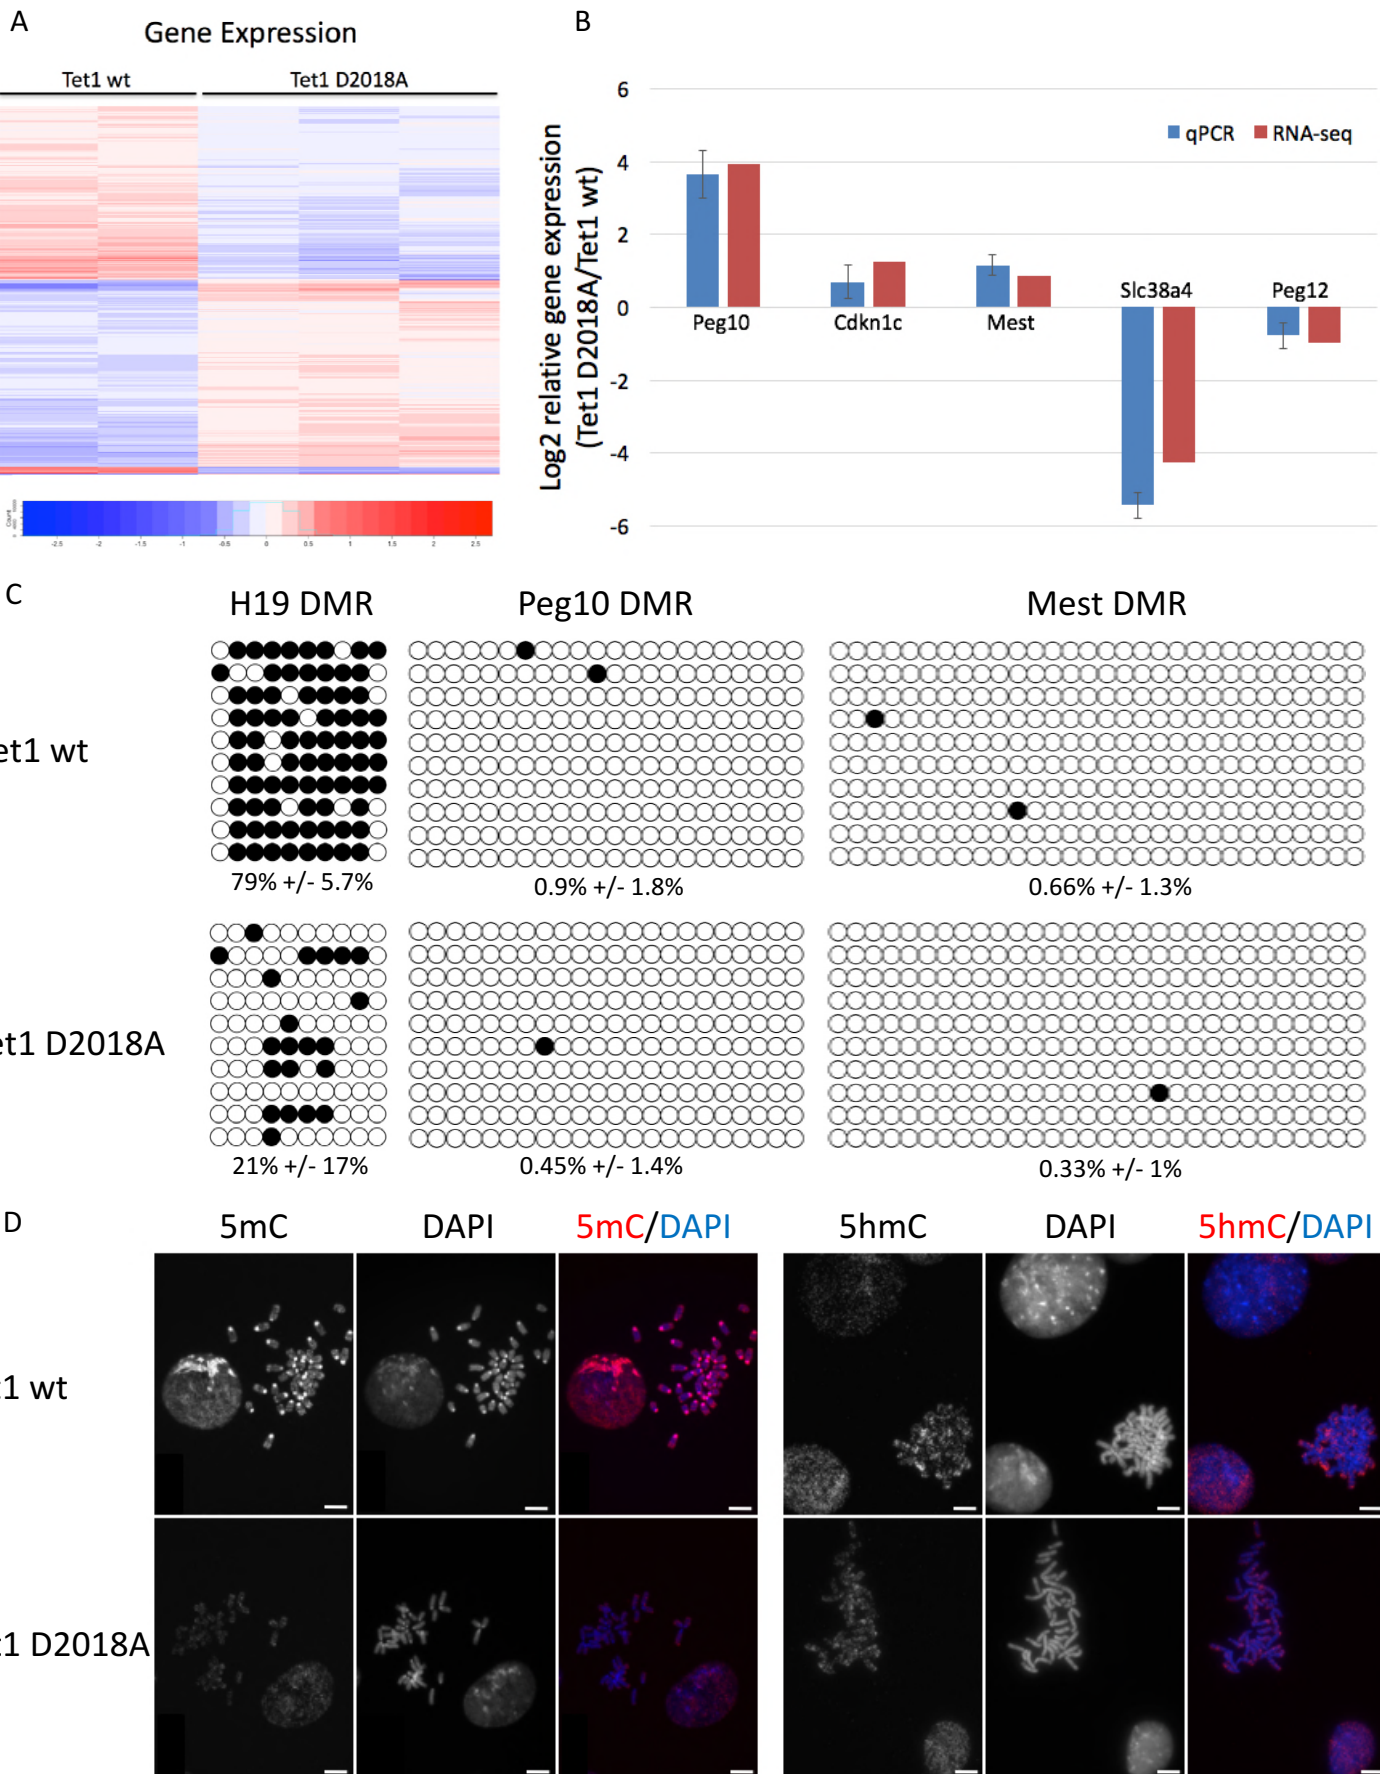

**Fig. 7: The D2018A mutation alters 5mC distribution and gene expression**

A) Heatmap depicting gene expression changes between Tet1 wt and D2018A mESCs. B) RT-qPCR analysis of 5 selected imprinted genes from the RNA-seq dataset. Each reaction was performed in triplicate. Error bars represent s.d. C) Targeted bisulfite analysis of DMRs associated with 3 imprinted genes. Filled circles depict 5mC or 5hmC, empty circles depict unmodified C. Error represents s.d. D) Immunofluorescence staining for 5mC and 5hmC on chromosome spreads. Scale bar: 10um.

## Figure 8

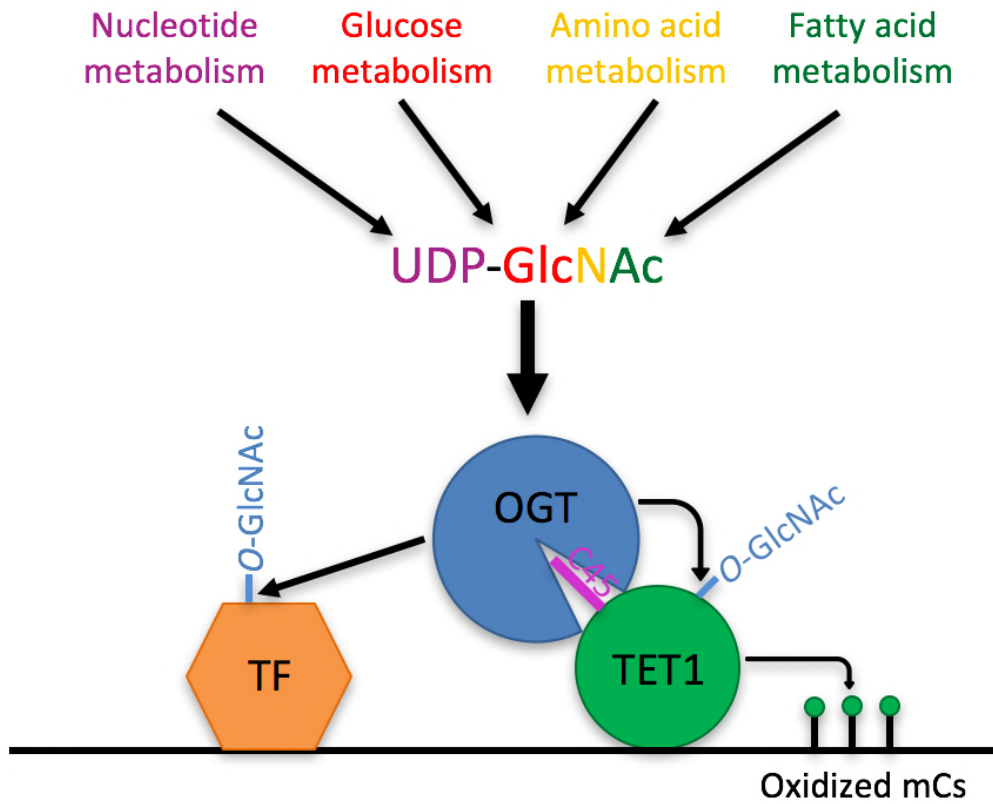

### Fig. 8: Model

Model showing two roles of the TET1-OGT interaction in regulation of gene expression. OGT's activity is regulated by the abundance of its cofactor UDP-GlcNAc, whose synthesis has inputs from nucleotide, glucose, amino acid, and fatty acid metabolism. OGT (blue circle) binds to TET1 (large green circle) via the TET1 C45 (purple line). OGT modifies TET1 and regulates its catalytic activity (small green circles representing modified cytosines). At the same time, TET1 binding to DNA brings OGT into proximity of other DNA-bound transcription factors (orange hexagon), which OGT also modifies and regulates.

1 **Supplementary File 1A:**  
2 **Primers used for creating and genotyping mESC lines**

3

| <b>Name</b> | <b>Purpose</b>                                                                    | <b>Sequence</b>      |
|-------------|-----------------------------------------------------------------------------------|----------------------|
| WtAmpFwd    | Forward primer for amplifying Tet1 wt Gene Blocks to make HDR template            | atcaaccttaaccgagaca  |
| MutAmpFwd   | Forward primer for amplifying Tet1 D2018A Gene Blocks to make HDR template        | tcaaccttaaccgagcc    |
| AmpRev      | Reverse primer for amplifying Tet1 wt and D2018A Gene Blocks to make HDR template | cttttaacagcaccggaaa  |
| GenotypeFwd | Forward primer for genotyping Tet1 allele                                         | tgatgtatccccgaagc    |
| GenotypeRev | Reverse primer for genotyping Tet1 allele                                         | cccactacaccacattagca |

4

1 **Supplementary File 1B:**  
 2 **Gene blocks amplified to make HDR templates**

| Name                     | Sequence                                                                                                                                                                                                                                                                                                                                                                                                                                                                                                                                                                                                                                                                                                                                                                                                                                                                                                                                                                                                                                                                                                                                                                                                |
|--------------------------|---------------------------------------------------------------------------------------------------------------------------------------------------------------------------------------------------------------------------------------------------------------------------------------------------------------------------------------------------------------------------------------------------------------------------------------------------------------------------------------------------------------------------------------------------------------------------------------------------------------------------------------------------------------------------------------------------------------------------------------------------------------------------------------------------------------------------------------------------------------------------------------------------------------------------------------------------------------------------------------------------------------------------------------------------------------------------------------------------------------------------------------------------------------------------------------------------------|
| Tet1 wt-3xF-T2A-GFP      | gcagaccgggagtgctctgatgtatccccgaagccaatttatcacaccaaattccttctcgagttgcatcaacctt<br>aaccgagacaatggtgtaccgtgtcccatactctctcactcatgttgccggaccatacaatcgttgggtcgact<br>acaaagaccatgacggtgattataaagatcatgatatcgattacaaggatgacgatgacaaggaagcggagag<br>ggagaggaagtctgctaacaatgcggtgacgtcgaggagaatcctggacctgtgagcaagggcgaggagctgtt<br>caccgggggtggtgccatcctggtcgagctggacggcgacgtaaaccggccaagaattcagcgtgtccggcgagg<br>gcgagggcgatgccacctacggcaagctgacctgaaatttattgacgacagggaaagctcccgtgccctggc<br>ccaccctgttacgaccctaacataggcgtgacgtgcttcagccgctaccggatcatatgaagcaacacgactt<br>cttaagtacgcatgccgaaggctacgtccaggagcgaccatcttctcaaggacgacggcaactacaagac<br>ccgcccggaggtgaagttcgagggcgacacctggtgaaccgcatcgagctgaagggcatcgacttcaaggagg<br>acggcaacatcctggggcacaagctggagtacaactacaacagccacaacgtctatatcatggccgacaagcag<br>aagaacggcatcaaggtgaactcaagatccgccacaacatcgaggacggcagcgtgacgctcggaccacta<br>ccagcagaacacccccatcggcgacggccccgtgctgctgccgacaaccactacgtgacccagtcgcct<br>gagcaagaccccaacgagaagcgcgatcacatggtcctgctggagttcgtgaccgccgggatcactctcg<br>catggacgagctgtacaagtaaaagcttctctcatgtaatgcatttgctaattggtgtagtggtatTTTTgtt<br>tgtttgtttctttgtttttgtttttccgggtgctgttaaaaagaaagtcattctgttgttactgtagcttgttcc<br>ccatttc |
| Tet1 D2018A-3xF-T2A-GFP  | gcagaccgggagtgctctgatgtatccccgaagccaatttatcacaccaaattccttctcgagttgcatcaacctt<br>aaccgagccaatggtgtaccgtgtcccatactctctcactcatgttgccggaccatacaatcgttgggtcgact<br>acaaagaccatgacggtgattataaagatcatgatatcgattacaaggatgacgatgacaaggaagcggagag<br>ggagaggaagtctgctaacaatgcggtgacgtcgaggagaatcctggacctgtgagcaagggcgaggagctgtt<br>caccgggggtggtgccatcctggtcgagctggacggcgacgtaaaccggccaagaattcagcgtgtccggcgagg<br>gcgagggcgatgccacctacggcaagctgacctgaaatttattgacgacagggaaagctcccgtgccctggc<br>ccaccctgttacgaccctaacataggcgtgacgtgcttcagccgctaccggatcatatgaagcaacacgactt<br>cttaagtacgcatgccgaaggctacgtccaggagcgaccatcttctcaaggacgacggcaactacaagac<br>ccgcccggaggtgaagttcgagggcgacacctggtgaaccgcatcgagctgaagggcatcgacttcaaggagg<br>acggcaacatcctggggcacaagctggagtacaactacaacagccacaacgtctatatcatggccgacaagcag<br>aagaacggcatcaaggtgaactcaagatccgccacaacatcgaggacggcagcgtgacgctcggaccacta<br>ccagcagaacacccccatcggcgacggccccgtgctgctgccgacaaccactacgtgacccagtcgcct<br>gagcaagaccccaacgagaagcgcgatcacatggtcctgctggagttcgtgaccgccgggatcactctcg<br>catggacgagctgtacaagtaaaagcttctctcatgtaatgcatttgctaattggtgtagtggtatTTTTgtt<br>tgtttgtttctttgtttttgtttttccgggtgctgttaaaaagaaagtcattctgttgttactgtagcttgttcc<br>ccatttc |
| Tet1 wt-3xF-T2A-tdTomato | gcagaccgggagtgctctgatgtatccccgaagccaatttatcacaccaaattccttctcgagttgcatcaacctt<br>aaccgagacaatggtgtaccgtgtcccatactctctcactcatgttgccggaccatacaatcgttgggtcgact<br>acaaagaccatgacggtgattataaagatcatgatatcgattacaaggatgacgatgacaaggaagcggagag<br>ggagaggaagtctgctaacaatgcggtgacgtcgaggagaatcctggacctgttccaaaggggaggaagtcatt<br>aaggaatttatgaggttcaaagtgcgcatggagggatctatgaacggccacgaatttgagatagaaggcgaagg                                                                                                                                                                                                                                                                                                                                                                                                                                                                                                                                                                                                                                                                                                                                                                                                     |



|                                  |                                                                                                                                                                                                                                                                                                                                                                                                                                                                                                                                                                                                                                                                                                                                                                                                                                                                                                                                                                                                                                                                                                                                                                                                                                                                                                                                                                                                                                                                                                                                                                                                                                                                                                                                                                                                                                                                                 |
|----------------------------------|---------------------------------------------------------------------------------------------------------------------------------------------------------------------------------------------------------------------------------------------------------------------------------------------------------------------------------------------------------------------------------------------------------------------------------------------------------------------------------------------------------------------------------------------------------------------------------------------------------------------------------------------------------------------------------------------------------------------------------------------------------------------------------------------------------------------------------------------------------------------------------------------------------------------------------------------------------------------------------------------------------------------------------------------------------------------------------------------------------------------------------------------------------------------------------------------------------------------------------------------------------------------------------------------------------------------------------------------------------------------------------------------------------------------------------------------------------------------------------------------------------------------------------------------------------------------------------------------------------------------------------------------------------------------------------------------------------------------------------------------------------------------------------------------------------------------------------------------------------------------------------|
|                                  | <p>cgaggggaaggccctacgagggcactcagactgctaagctgaaagtaactaagggtggcctctgcctttcgctg<br/>ggatatcctgtcaccagtttatgtacggtagtaaagcttatgtgaagcatcccgtgatatacctgactataaaa<br/>aactgtccttccagagggctcaagtgggagcgagtaataaacttgaagatgggtggactggttaccgttaccca<br/>agattcatctttgcaggacggaacattgatctacaaggtaagatgcggggactaactcccaccgacgggcc<br/>agtcatgcagaagaagactatgggctgggaagctagtagcacttaccctagagatgggtgcttgaaagg<br/>ggagattcatcaagcactgaaattgaaagacggcggtcattacctcgtcgaattcaaaacatatacatggccaa<br/>aaagcctgtgcaactgccagggtattattatgtcgacacaaaactcgatataaccagccataatgaagattatacc<br/>atagtcgaacaatatgaacgctctgaaggacgacatcattgttcttgggacatgggactggatccacaggatccg<br/>gttctctggaacagcatcctcgaagacaataataggccgtaataaagaattcatgcgattcaaagtgagaat<br/>ggaaggaagtatgaatgggtcacgagtttgaatcgagggagaaggagagggtcggccctatgaggggtacacag<br/>acagctaagttgaaggttactaaggcgccctcttcccttggctgggatattctctcccacaattcatgtacggg<br/>tccaaggcttacgtaaaacatcccgtgatatacccgattcaaaaaactgtccttcccgaaggctttaaagg<br/>aaagggtgatgaatttcgaggacgggggattggtaactgtcacacaggattcctctctcaagatggaacactgat<br/>ttacaaggtaaaaatgagagggaccaactttcccctgatgggccctgatgcaaaagaaaaccatgggctggg<br/>aagcatctaccgagagactttatcccaggacggcggttcttaaggagagattaccaagctttgaaacttaagg<br/>atggaggtcactacctcgtggagttaagacaatatatggcaaaaaaccagtccaactcccggatactatta<br/>cgttgataccaaactggacataacttctcataacgaggactacactatagtggaacaatatgaacgctctgaggggt<br/>cgacaccacctttcctgtatggaatggatgaactgtataagtagtaaaagcttctctcatgtaatgcatttgcta<br/>gtgggttagtgggtatTTTTGTTGTTGTTGTTTCTTTGTTTTGTTTTTCCGGTGTCTGTTAAAAAGAAAGTCATT<br/>CTGTTGTTACTGTAGCTTGTTCGCCATTC</p>                                                                                                                                                                                                                                                                                         |
| Tet1 D2018A-3xF-<br>T2A-tdTomato | <p>gcagaccgggagtgctctgatgtatccccgaagccaatttatcacaccaaattccttctcgagttgcatcaacctt<br/>aaccgagccaatgttgttaccgtgtcccatactctcactcatgttgcgggaccatacaatcgttgggtcgact<br/>acaagaccatgacgggtattataaagatcatgatatcgattacaaggatgacgatgacaaggggaagcggagag<br/>ggcagaggaagtctgtaacatgcgggtgacgtcaggagaaatcctggacctgttccaaaggggaggaagtcatt<br/>aaggaatttatgaggttcaaagtgcgcatggaggatctatgaacggccacgaattgagatagaaggcgaagg<br/>cgaggggaaggccctacgagggcactcagactgctaagctgaaagtaactaagggtggcctctgcctttcgctg<br/>ggatatcctgtcaccagtttatgtacggtagtaaagcttatgtgaagcatcccgtgatatacctgactataaaa<br/>aactgtccttccagagggctcaagtgggagcgagtaataaacttgaagatgggtggactggttaccgttaccca<br/>agattcatctttgcaggacggaacattgatctacaaggtaagatgcggggactaactcccaccgacgggcc<br/>agtcatgcagaagaagactatgggctgggaagctagtagcacttaccctagagatgggtgcttgaaagg<br/>ggagattcatcaagcactgaaattgaaagacggcggtcattacctcgtcgaattcaaaacatatacatggccaa<br/>aaagcctgtgcaactgccagggtattattatgtcgacacaaaactcgatataaccagccataatgaagattatacc<br/>atagtcgaacaatatgaacgctctgaaggacgacatcattgttcttgggacatgggactggatccacaggatccg<br/>gttctctggaacagcatcctcgaagacaataataggccgtaataaagaattcatgcgattcaaagtgagaat<br/>ggaaggaagtatgaatgggtcacgagtttgaatcgagggagaaggagagggtcggccctatgaggggtacacag<br/>acagctaagttgaaggttactaaggcgccctcttcccttggctgggatattctctcccacaattcatgtacggg<br/>tccaaggcttacgtaaaacatcccgtgatatacccgattcaaaaaactgtccttcccgaaggctttaaagg<br/>aaagggtgatgaatttcgaggacgggggattggtaactgtcacacaggattcctctctcaagatggaacactgat<br/>ttacaaggtaaaaatgagagggaccaactttcccctgatgggccctgatgcaaaagaaaaccatgggctggg<br/>aagcatctaccgagagactttatcccaggacggcggttcttaaggagagattaccaagctttgaaacttaagg<br/>atggaggtcactacctcgtggagttaagacaatatatggcaaaaaaccagtccaactcccggatactatta<br/>cgttgataccaaactggacataacttctcataacgaggactacactatagtggaacaatatgaacgctctgaggggt<br/>cgacaccacctttcctgtatggaatggatgaactgtataagtagtaaaagcttctctcatgtaatgcatttgcta</p> |

|  |                                                                                                                |
|--|----------------------------------------------------------------------------------------------------------------|
|  | gtggtagtaggggtatgtttgtttgtttgtttctttgtttttgtttttccgggctgttaaaaagaaagtcatt<br>ctgttgtttactgtagctttgtttcgccatttc |
|--|----------------------------------------------------------------------------------------------------------------|

## Supplementary File 2A: Primers used for qPCR

| Gene           | Primers                    |
|----------------|----------------------------|
| <i>Peg10</i>   | Fwd: gaatcctcgtgtggaacag   |
|                | Rev: cagttggaggaaccacc     |
| <i>Cdkn1c</i>  | Fwd: gtctgagatgagtttagaggc |
|                | Rev: gctacatgaacgaaaggtccc |
| <i>Mest</i>    | Fwd: ctaccaagattctgtcgggtg |
|                | Rev: gtcagcccttcccagatc    |
| <i>Slc38a4</i> | Fwd: gccaaggaaggagggtctc   |
|                | Rev: ggctccaatgttctgcattg  |
| <i>Peg12</i>   | Fwd: gggatgagcacactgttttc  |
|                | Rev: ggccagaagcacagacac    |

1 **Supplementary File 2B: Primers and DMRs used in bisulfite analysis**

2

3 Phage lambda control primers:

4 Fwd: AGTTTGTTATTGTTAGGAAAGTGGTAAA

5 Rev: TCAACCTAAATCATTAAACCTACC

6

| Gene         | Primers                             | DMR coordinates (GRCm38/mm10)   |
|--------------|-------------------------------------|---------------------------------|
| <i>H19</i>   | Fwd: TGATGGTTTTAGAATTTTATAAGTTAGATA | Chr7: 142,581,610 – 142,581,931 |
|              | Rev: ACAATACCACTAAAAAACAAAACAC      |                                 |
| <i>Peg10</i> | Fwd: AGGATTTTTTTATATAAGGTAAGTAGTT   | Chr6: 4,747,317 – 4,747,732     |
|              | Rev: ACCACTAAAACTTAACAAAATTTAC      |                                 |
| <i>Mest</i>  | Fwd: TTTTTATTAGAATTTGGGGTTTAGG      | Chr6: 30,737,763 – 30,738,178   |
|              | Rev: CAACAAAAACAACAACAACAACCTC      |                                 |

7

### Supplementary File 3: Analysis of zebrafish larvae

A) Representative images of larvae with high and low *runx1* expression. B) Embryo numbers and scoring for all 5 biological replicates.

A

runx1 high

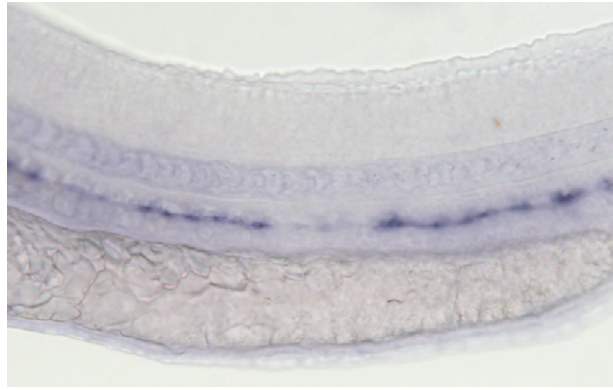

runx1 low

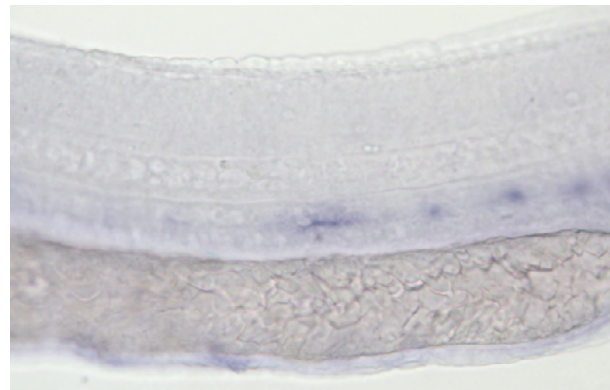

B

|                |               | siblings   |            |        |         |            |        |                 |            |        | tet2/3 double mutants |            |        |         |            |        |                 |            |        |
|----------------|---------------|------------|------------|--------|---------|------------|--------|-----------------|------------|--------|-----------------------|------------|--------|---------|------------|--------|-----------------|------------|--------|
|                | total embryos | uninjected |            |        | wt-tet1 |            |        | OGT mutant tet1 |            |        | uninjected            |            |        | wt-tet1 |            |        | OGT mutant tet1 |            |        |
|                |               | total      | runx1 high | % high | total   | runx1 high | % high | total           | runx1 high | % high | total                 | runx1 high | % high | total   | runx1 high | % high | total           | runx1 high | % high |
| Experiment 1   | 117           | 29         | 27         | 93%    | 28      | 26         | 93%    | 28              | 25         | 89%    | 17                    | 5          | 29%    | 6       | 4          | 67%    | 9               | 3          | 33%    |
| Experiment 2   | 207           | 39         | 38         | 97%    | 58      | 57         | 98%    | 56              | 53         | 95%    | 22                    | 4          | 18%    | 17      | 9          | 53%    | 15              | 5          | 33%    |
| Experiment 3   | 155           | 18         | 16         | 89%    | 54      | 50         | 93%    | 53              | 49         | 92%    | 10                    | 4          | 40%    | 8       | 4          | 50%    | 12              | 4          | 33%    |
| Experiment 4   | 105           | 20         | 20         | 100%   | 22      | 21         | 95%    | 35              | 32         | 91%    | 6                     | 2          | 33%    | 6       | 4          | 67%    | 16              | 5          | 31%    |
| Experiment 5   | 119           | 26         | 25         | 96%    | 24      | 24         | 100%   | 31              | 29         | 94%    | 20                    | 6          | 30%    | 4       | 3          | 75%    | 14              | 8          | 57%    |
| combined       | 703           | 132        | 126        | 95%    | 186     | 178        | 96%    | 203             | 188        | 93%    | 75                    | 21         | 28%    | 41      | 24         | 59%    | 66              | 25         | 38%    |
| Average        |               |            |            | 95%    |         |            | 96%    |                 |            | 92%    |                       |            | 30%    |         |            | 62%    |                 |            | 38%    |
| standard error |               |            |            | 2%     |         |            | 1.50%  |                 |            | 1%     |                       |            | 3.50%  |         |            | 4.70%  |                 |            | 4.90%  |



**Supplementary File 5: Imprinted genes expressed in WT-FLAG and D2018A-FLAG mESCs by RNA-seq (FDR<0.1)**

| Gene     | Fold change Tet1   |             | Expressed allele  |
|----------|--------------------|-------------|-------------------|
|          | D2018A vs. Tet1 wt | FDR         |                   |
| H19      | 30.07939985        | 1.26524E-05 | Maternal          |
| Peg10    | 15.27286243        | 5.7177E-167 | Paternal          |
| Sgce     | 4.56871756         | 4.82627E-39 | Paternal          |
| Plagl1   | 4.531120522        | 1.62958E-42 | Paternal          |
| Ascl2    | 3.049383378        | 0.008783808 | Maternal          |
| Pon2     | 2.855961581        | 1.49981E-11 | Maternal          |
| Cdkn1c   | 2.392053402        | 0.000507904 | Maternal          |
| Gnas     | 2.201425539        | 2.96858E-22 | Isoform dependent |
| Ppp1r9a  | 2.048437997        | 7.26E-15    | Maternal          |
| Zdbf2    | 2.007041918        | 1.03956E-09 | Paternal          |
| Mest     | 1.80802221         | 1.03E-06    | Paternal          |
| Gab1     | 1.771705398        | 2.05E-15    | Paternal          |
| Grb10    | 1.707247654        | 8.58E-10    | Isoform Dependent |
| Gnai3    | 1.541315861        | 5.17E-07    | Maternal          |
| Zrsr1    | 1.44428099         | 2.07E-05    | Paternal          |
| Snx14    | 1.416141778        | 0.000254672 | Paternal          |
| Mcts2    | 1.409534553        | 0.003930325 | Paternal          |
| Ftx      | 1.398619995        | 0.00195448  | Paternal          |
| Ube3a    | 1.344935489        | 0.009306501 | Maternal          |
| Nap1l4   | 1.295179554        | 0.000994415 | Maternal          |
| Tnfrsf22 | 1.285579829        | 0.068209734 | Maternal          |
| Peg3     | 1.260508163        | 0.006309819 | Paternal          |
| Cd81     | 1.235508238        | 0.006925337 | Maternal          |
| Rian     | 1.204214429        | 0.033779897 | Maternal          |
| Sfmbt2   | 0.859408979        | 0.090581667 | Paternal          |
| H13      | 0.854676254        | 0.090187544 | Maternal          |
| Xist     | 0.685644593        | 0.022103471 | Paternal          |
| Mkrn3    | 0.576526352        | 1.44E-06    | Paternal          |
| Sdhd     | 0.545467904        | 6.37E-12    | Unknown           |
| Slc22a18 | 0.523938587        | 0.008376626 | Maternal          |
| Peg12    | 0.505338554        | 1.81153E-05 | Paternal          |
| Tssc4    | 0.470382451        | 1.5702E-07  | Maternal          |
| Dio3     | 0.467910471        | 0.064241342 | Paternal          |
| Usp29    | 0.28735211         | 0.001162876 | Paternal          |
| Slc38a4  | 0.052064281        | 8.0026E-190 | Paternal          |

|                 |
|-----------------|
| Up >2-fold      |
| Up 1.5-2-fold   |
| Unchanged       |
| Down 1.5-2-fold |
| Down >2-fold    |
